# Supplementary material for: Modeling the impact of racial and ethnic disparities on COVID-19 epidemic dynamics
Source: eLife journal article supplement (doi:10.7554/elife.66601), 2021-05-18
Supplement: supp [file elife-66601-supp-v2.zip]

Archive with 22 entries (22 files):
- elife_poa_e66601_Figure_1_figure_supplement_1.png
- elife_poa_e66601_Figure_1_figure_supplement_2.png
- elife_poa_e66601_Figure_1_figure_supplement_3.png
- elife_poa_e66601_Figure_1_figure_supplement_4.png
- elife_poa_e66601_Figure_1_figure_supplement_5.png
- elife_poa_e66601_Figure_1_figure_supplement_6.png
- elife_poa_e66601_Figure_1_figure_supplement_7.png
- elife_poa_e66601_Figure_2_figure_supplement_1.png
- elife_poa_e66601_Figure_2_figure_supplement_2.png
- elife_poa_e66601_Figure_2_figure_supplement_3.png
- elife_poa_e66601_Figure_2_figure_supplement_4.png
- elife_poa_e66601_Figure_2_figure_supplement_5.png
- elife_poa_e66601_Figure_2_figure_supplement_6.png
- elife_poa_e66601_Figure_2_figure_supplement_7.png
- elife_poa_e66601_Figure_2_figure_supplement_8.png
- elife_poa_e66601_Figure_3_figure_supplement_1.png
- elife_poa_e66601_Figure_3_figure_supplement_2.png
- elife_poa_e66601_Figure_3_figure_supplement_3.png
- elife_poa_e66601_Supplementary_file_1.docx
- elife_poa_e66601_Supplementary_file_2.docx
- elife_poa_e66601_Supplementary_file_3.docx
- elife_poa_e66601_Transparent_Reporting_File.pdf
