# Supplementary figures and images for: Modeling the impact of racial and ethnic disparities on COVID-19 epidemic dynamics
Source: eLife journal article supplement (doi:10.7554/elife.66601), 2021-05-18

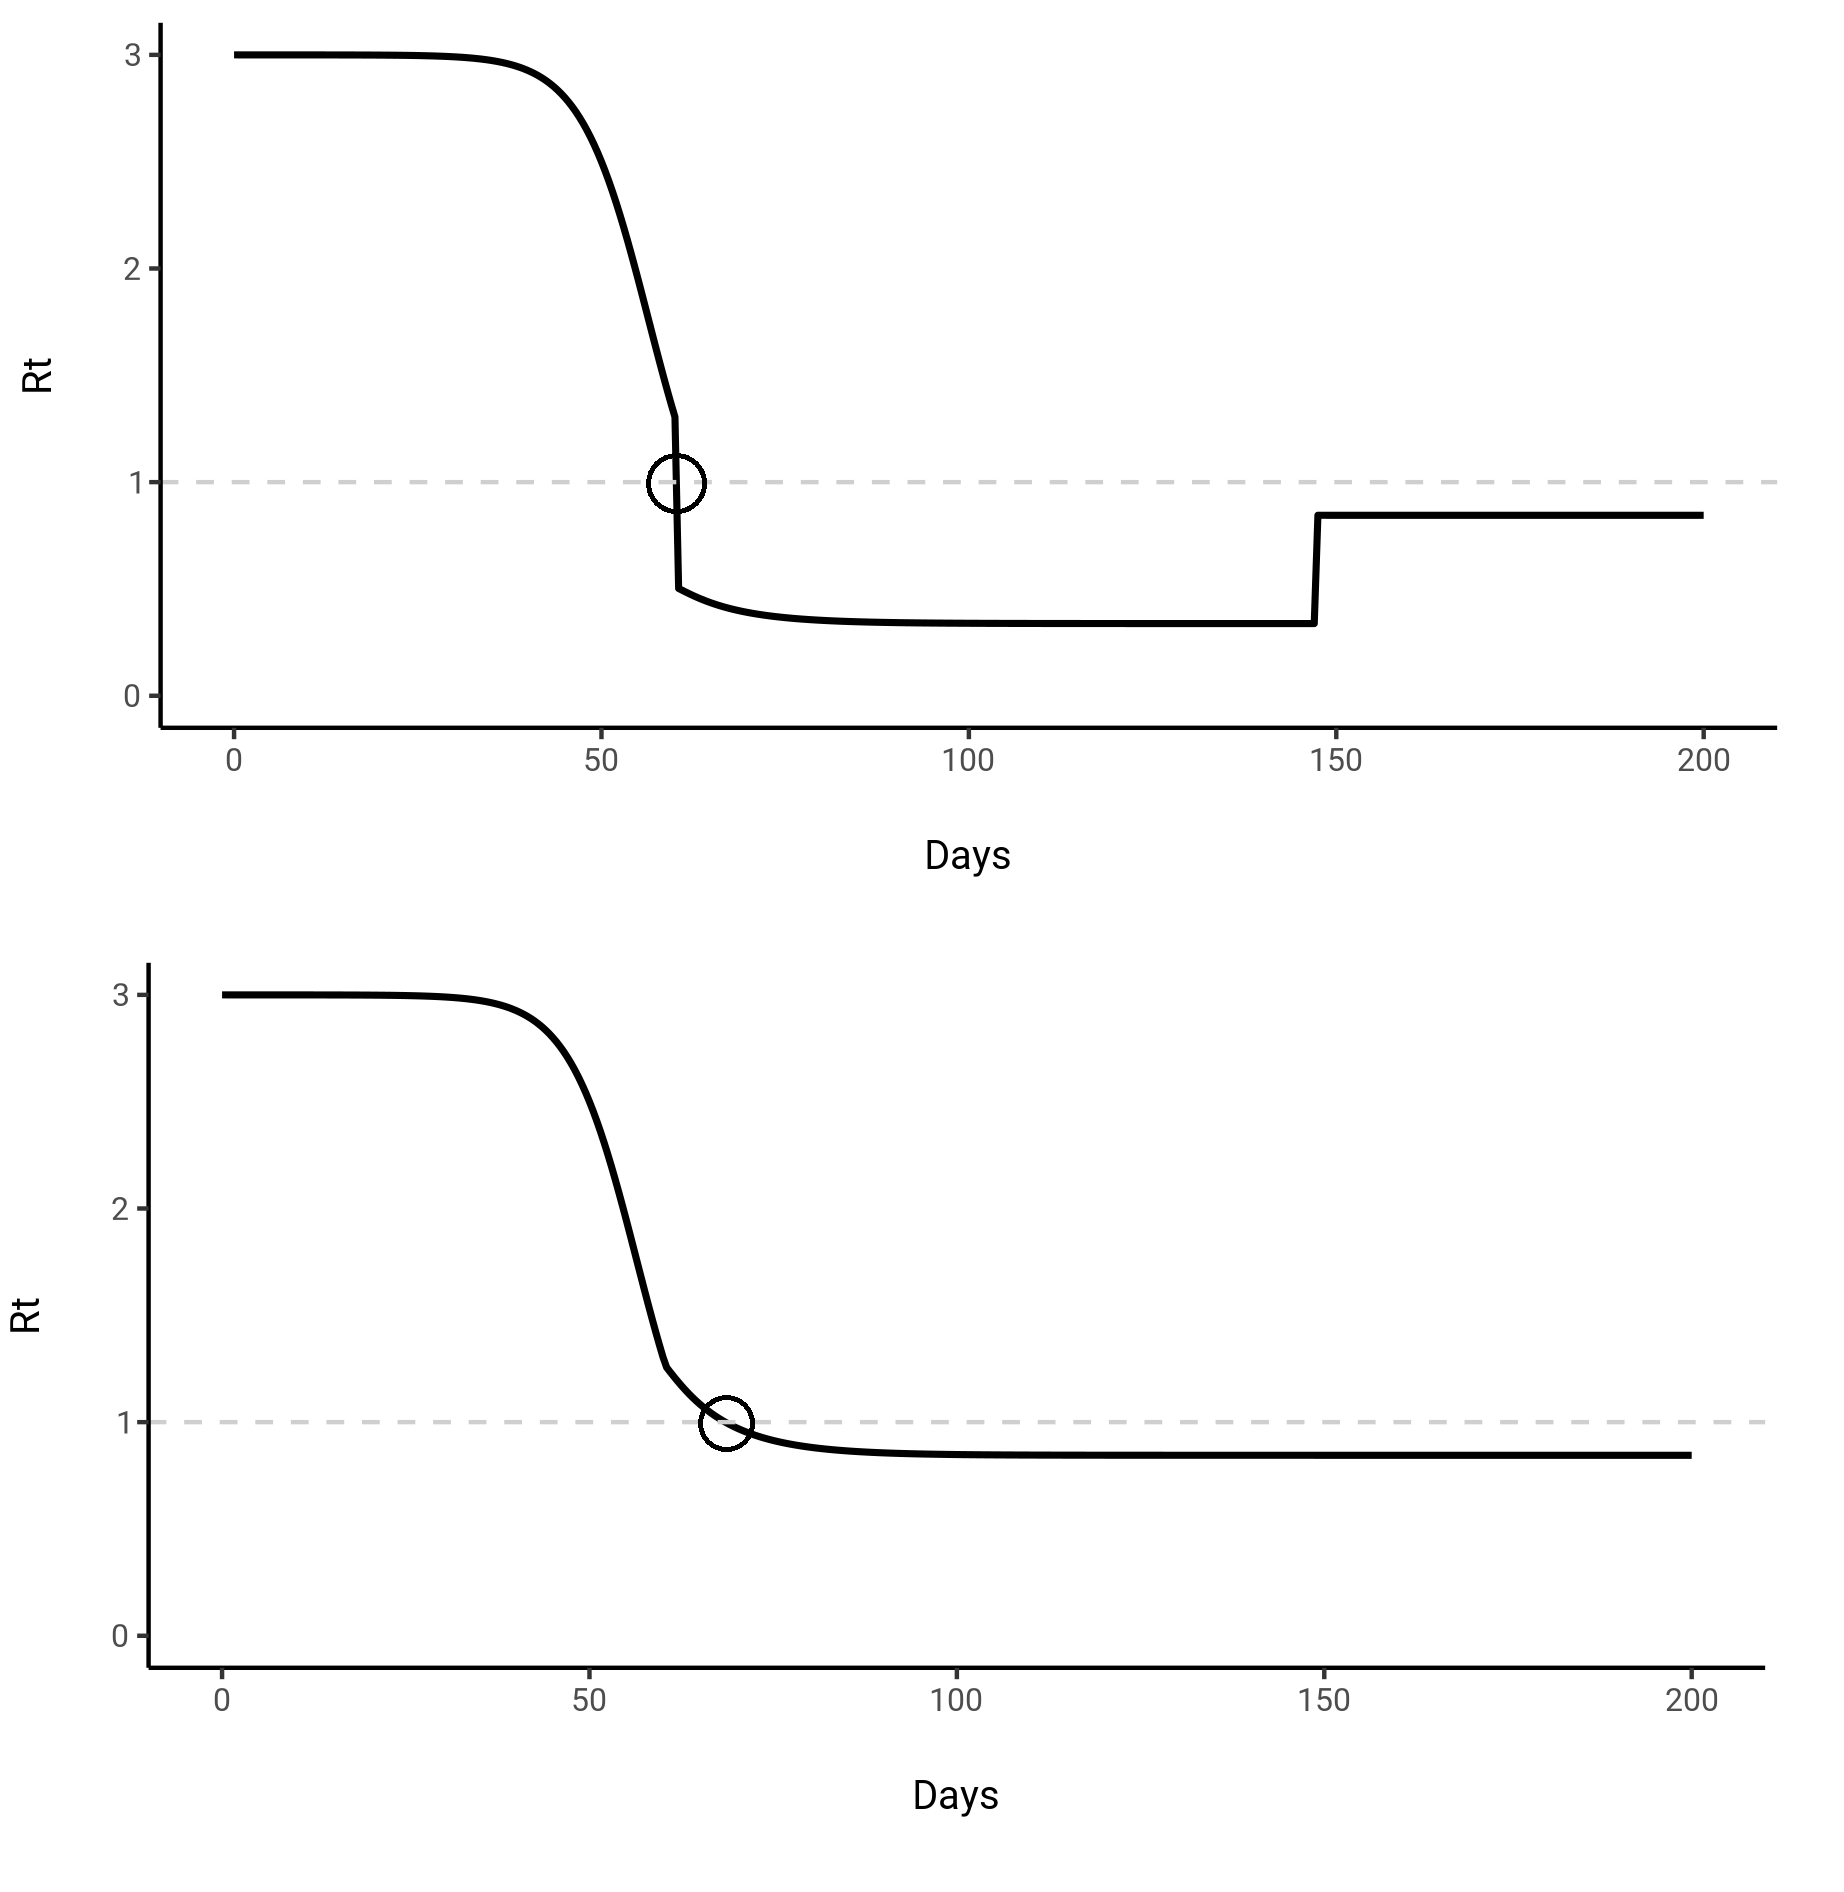

Supplement: supp [file elife-66601-supp-v2.zip › elife_poa_e66601_Figure_1_figure_supplement_1.png]

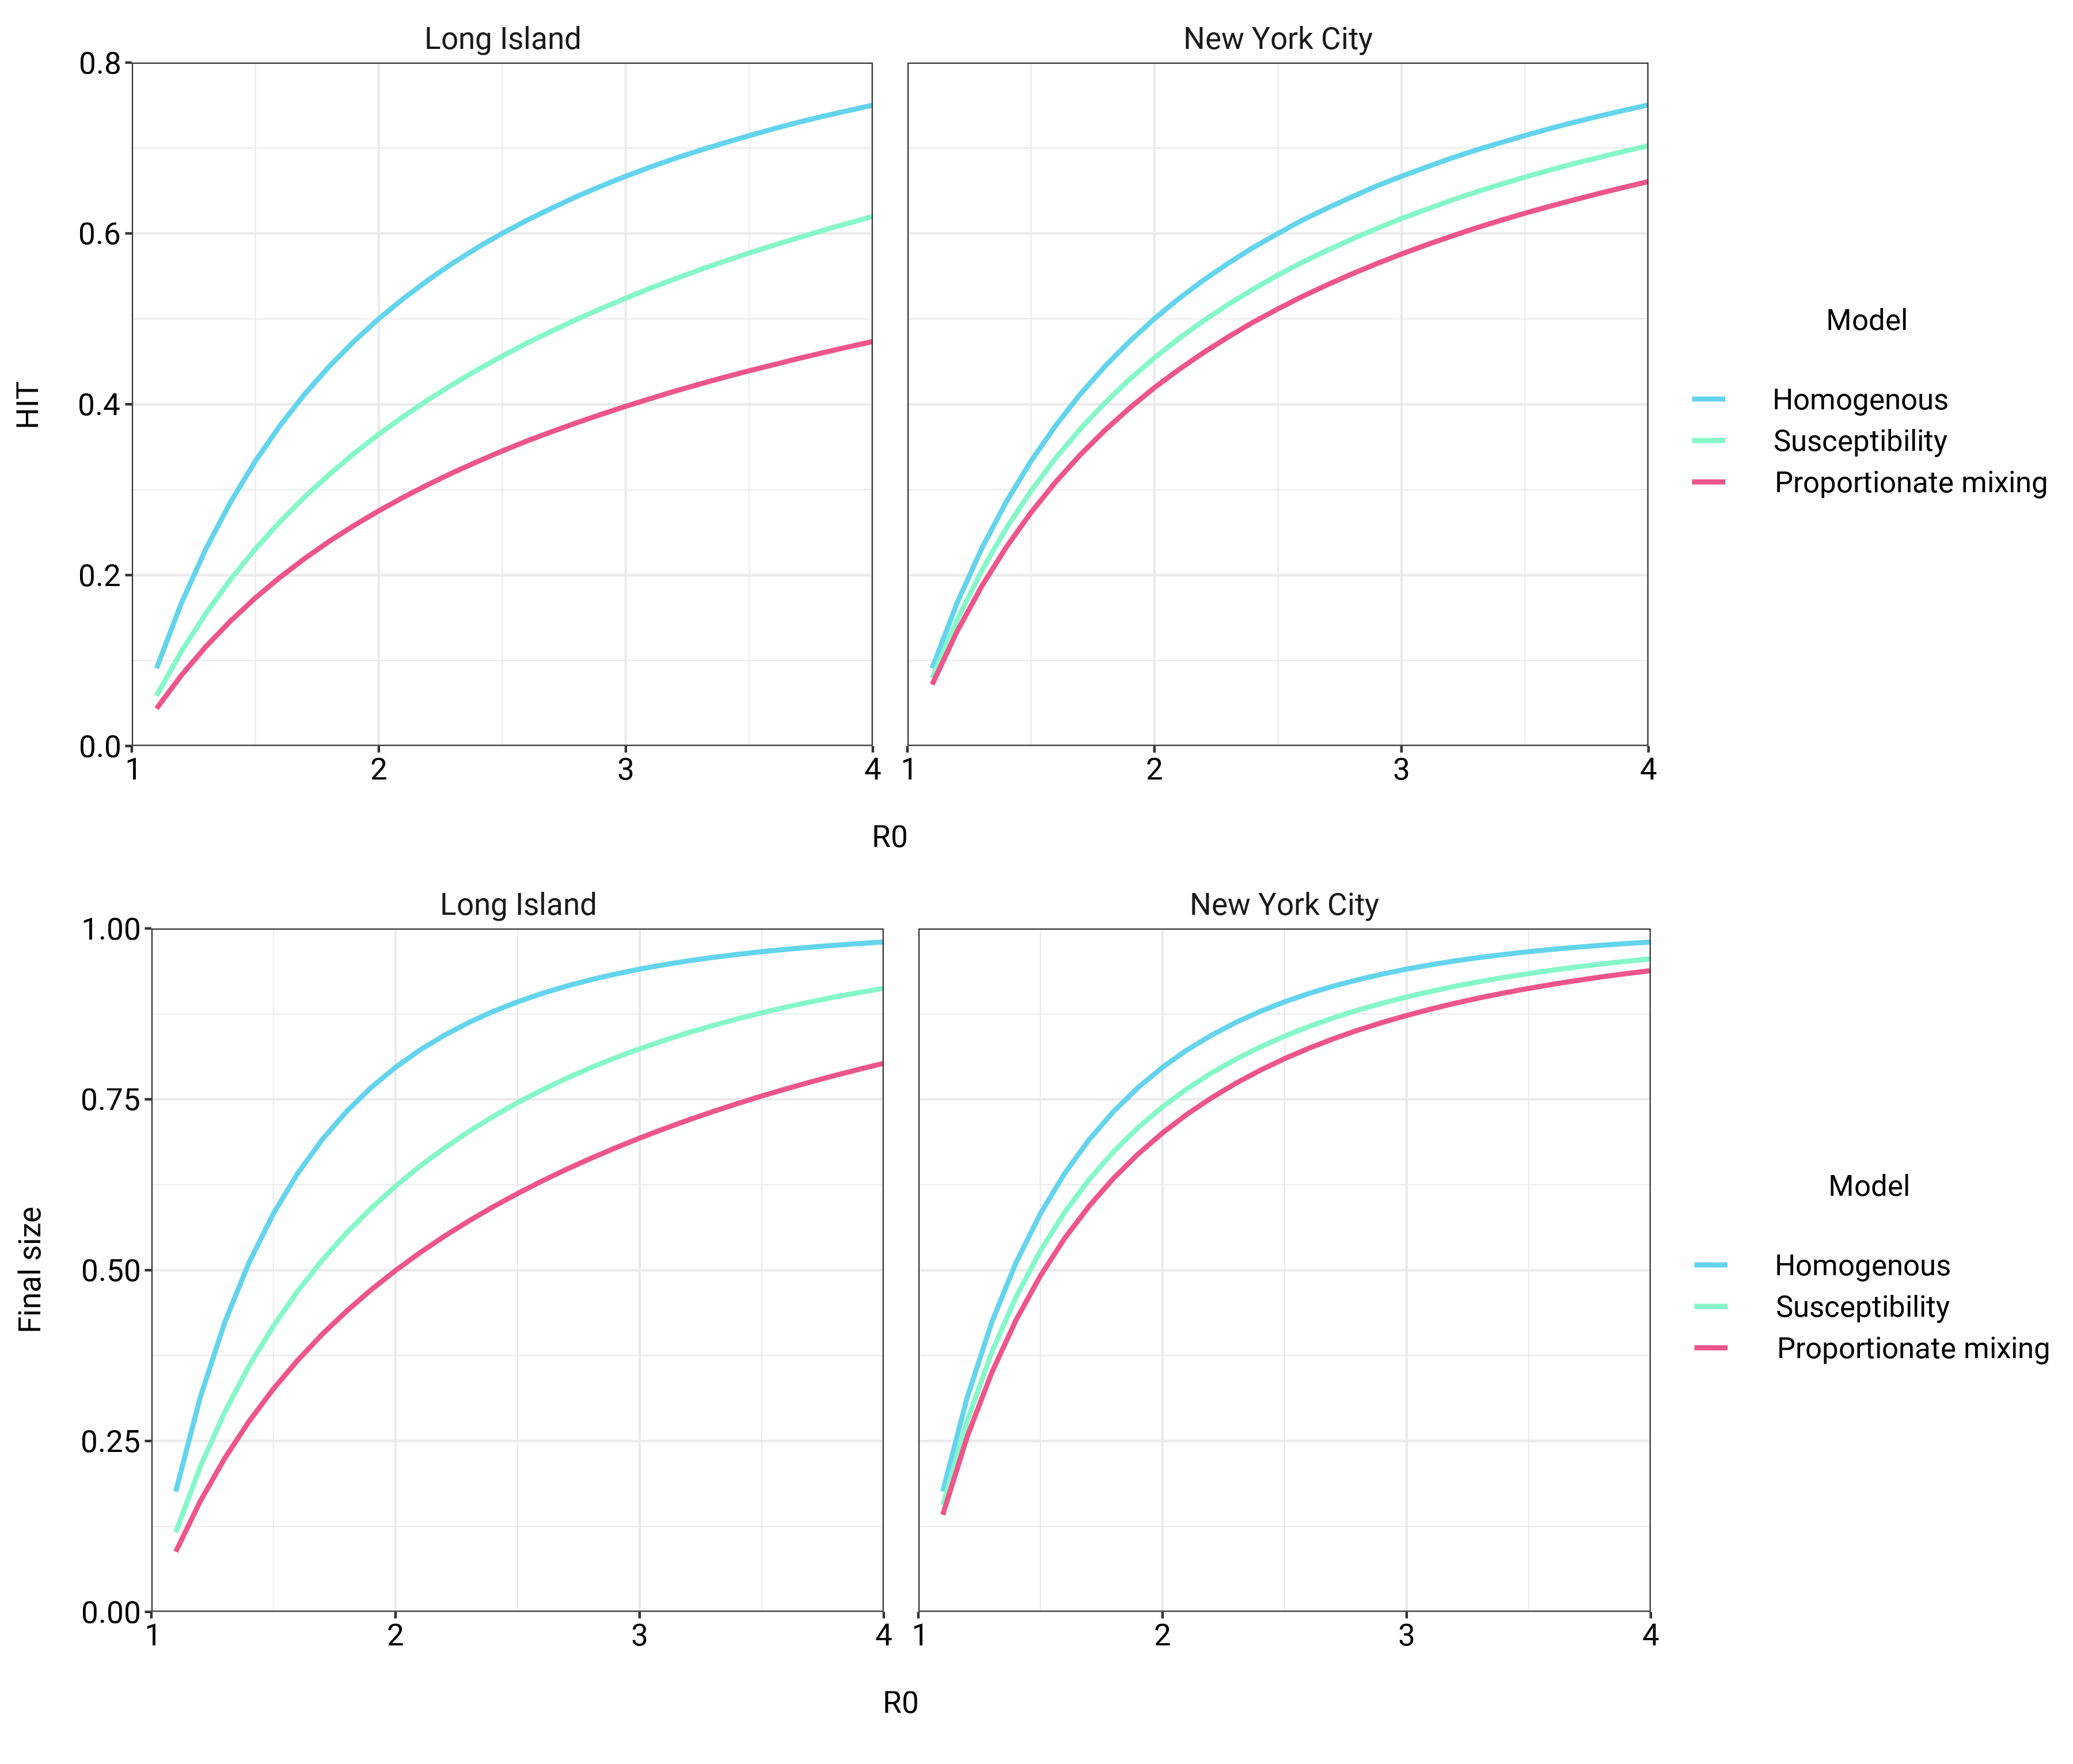

Supplement: supp [file elife-66601-supp-v2.zip › elife_poa_e66601_Figure_1_figure_supplement_2.png]

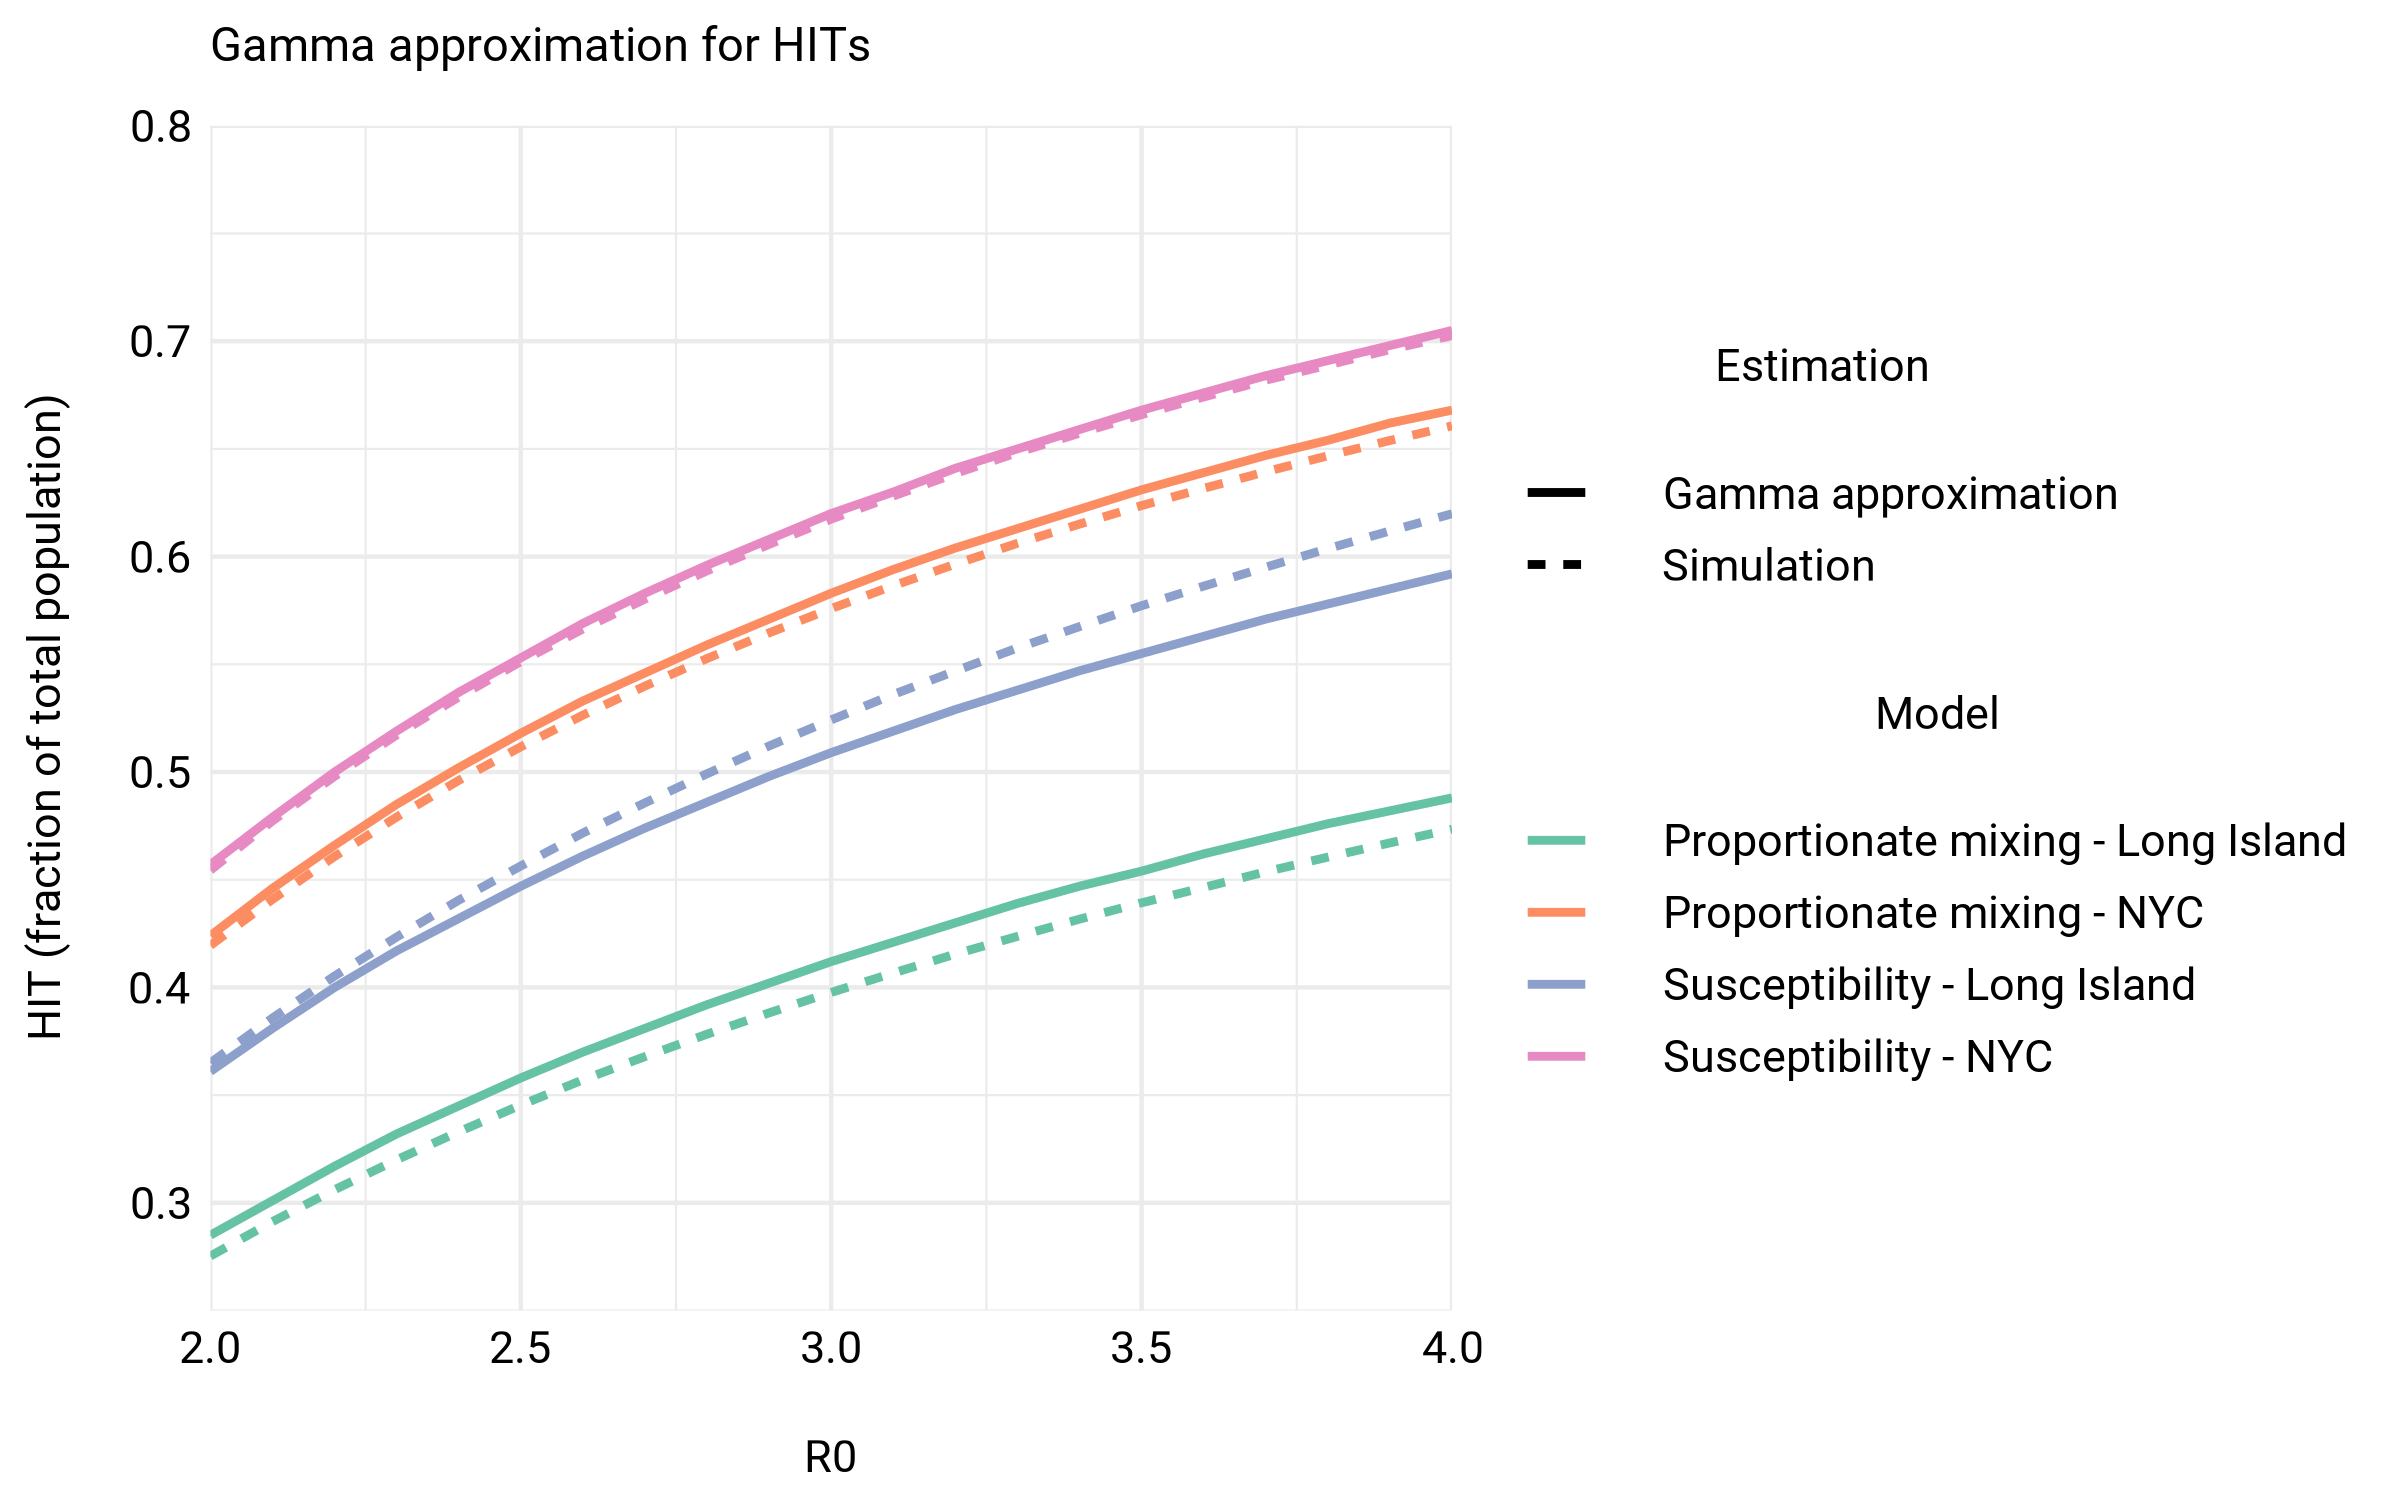

Supplement: supp [file elife-66601-supp-v2.zip › elife_poa_e66601_Figure_1_figure_supplement_3.png]

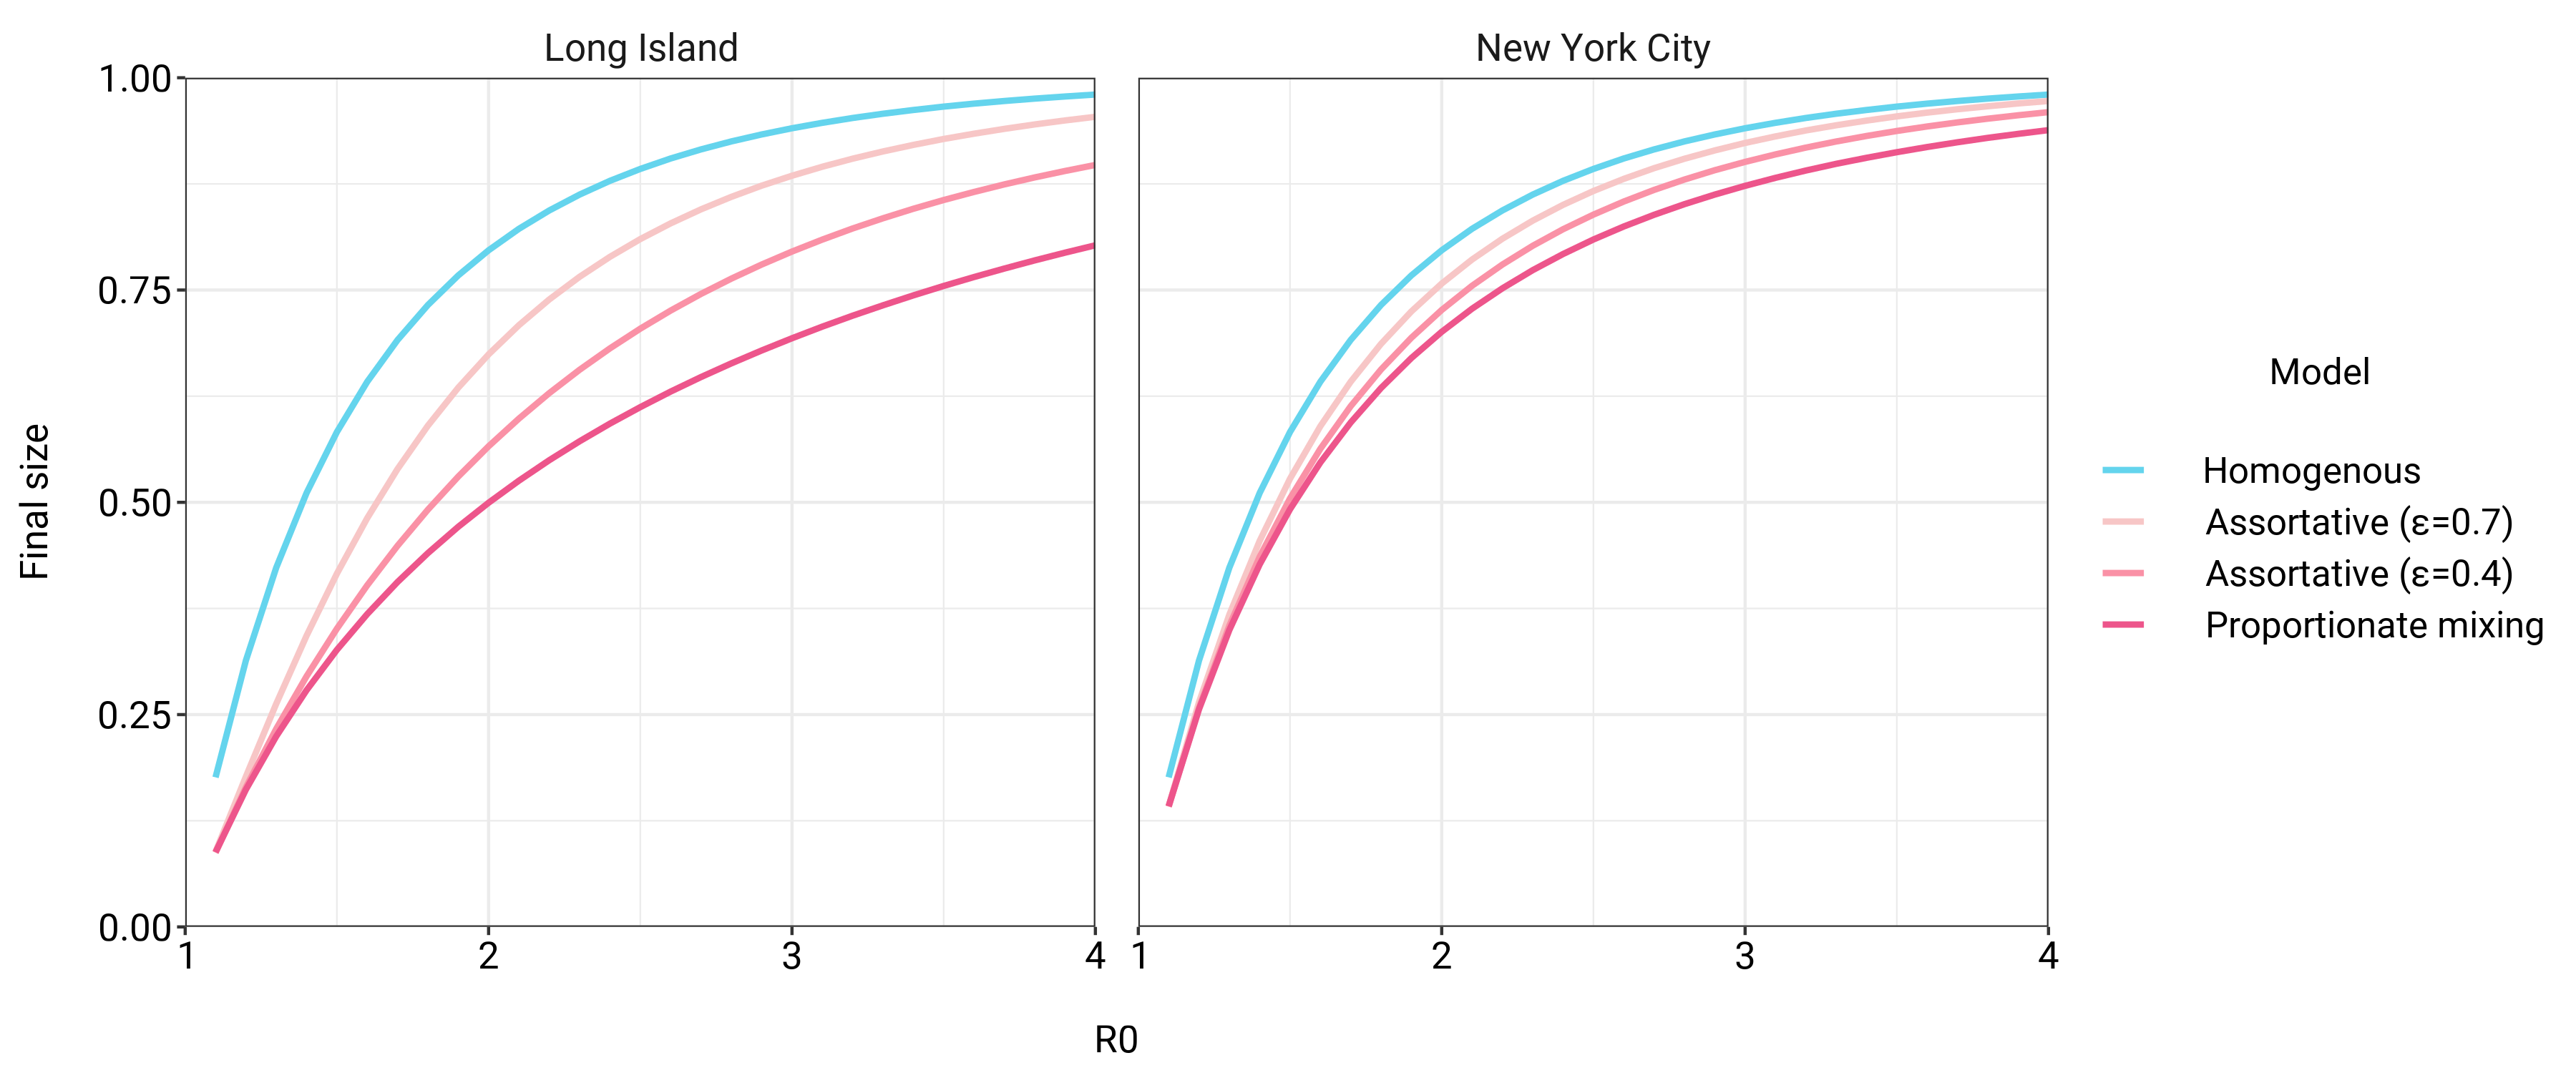

Supplement: supp [file elife-66601-supp-v2.zip › elife_poa_e66601_Figure_1_figure_supplement_4.png]

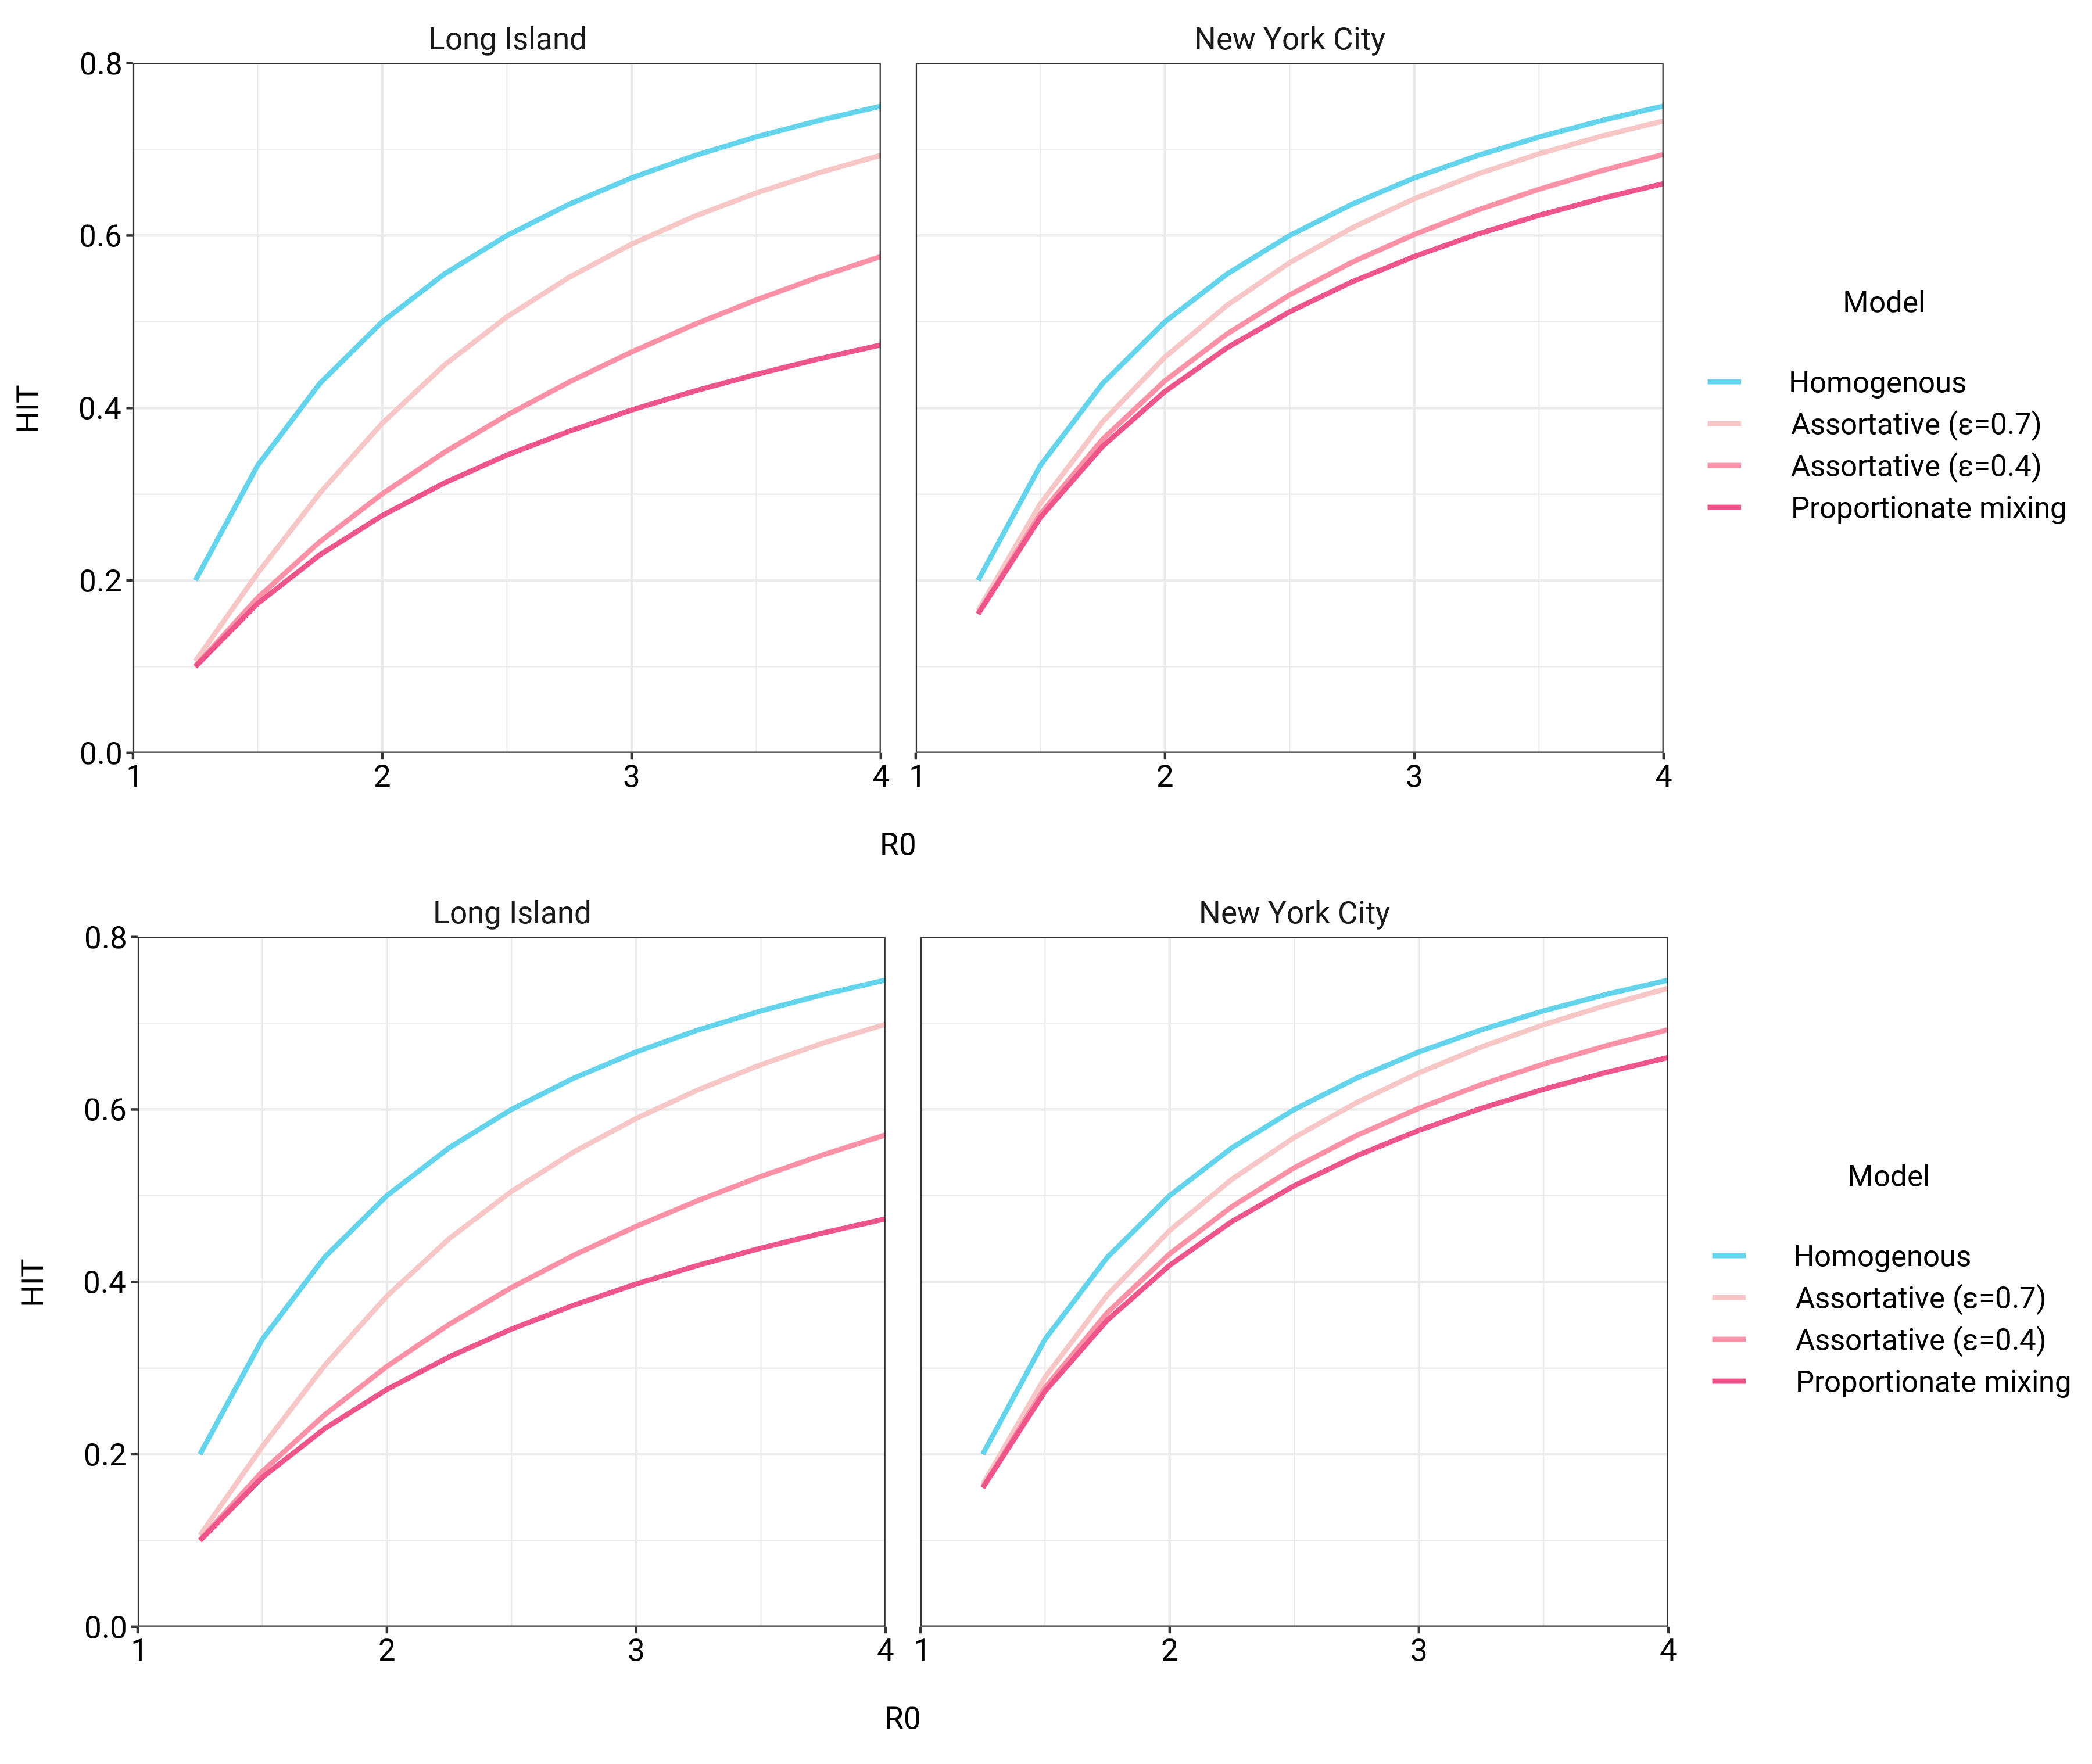

Supplement: supp [file elife-66601-supp-v2.zip › elife_poa_e66601_Figure_1_figure_supplement_5.png]

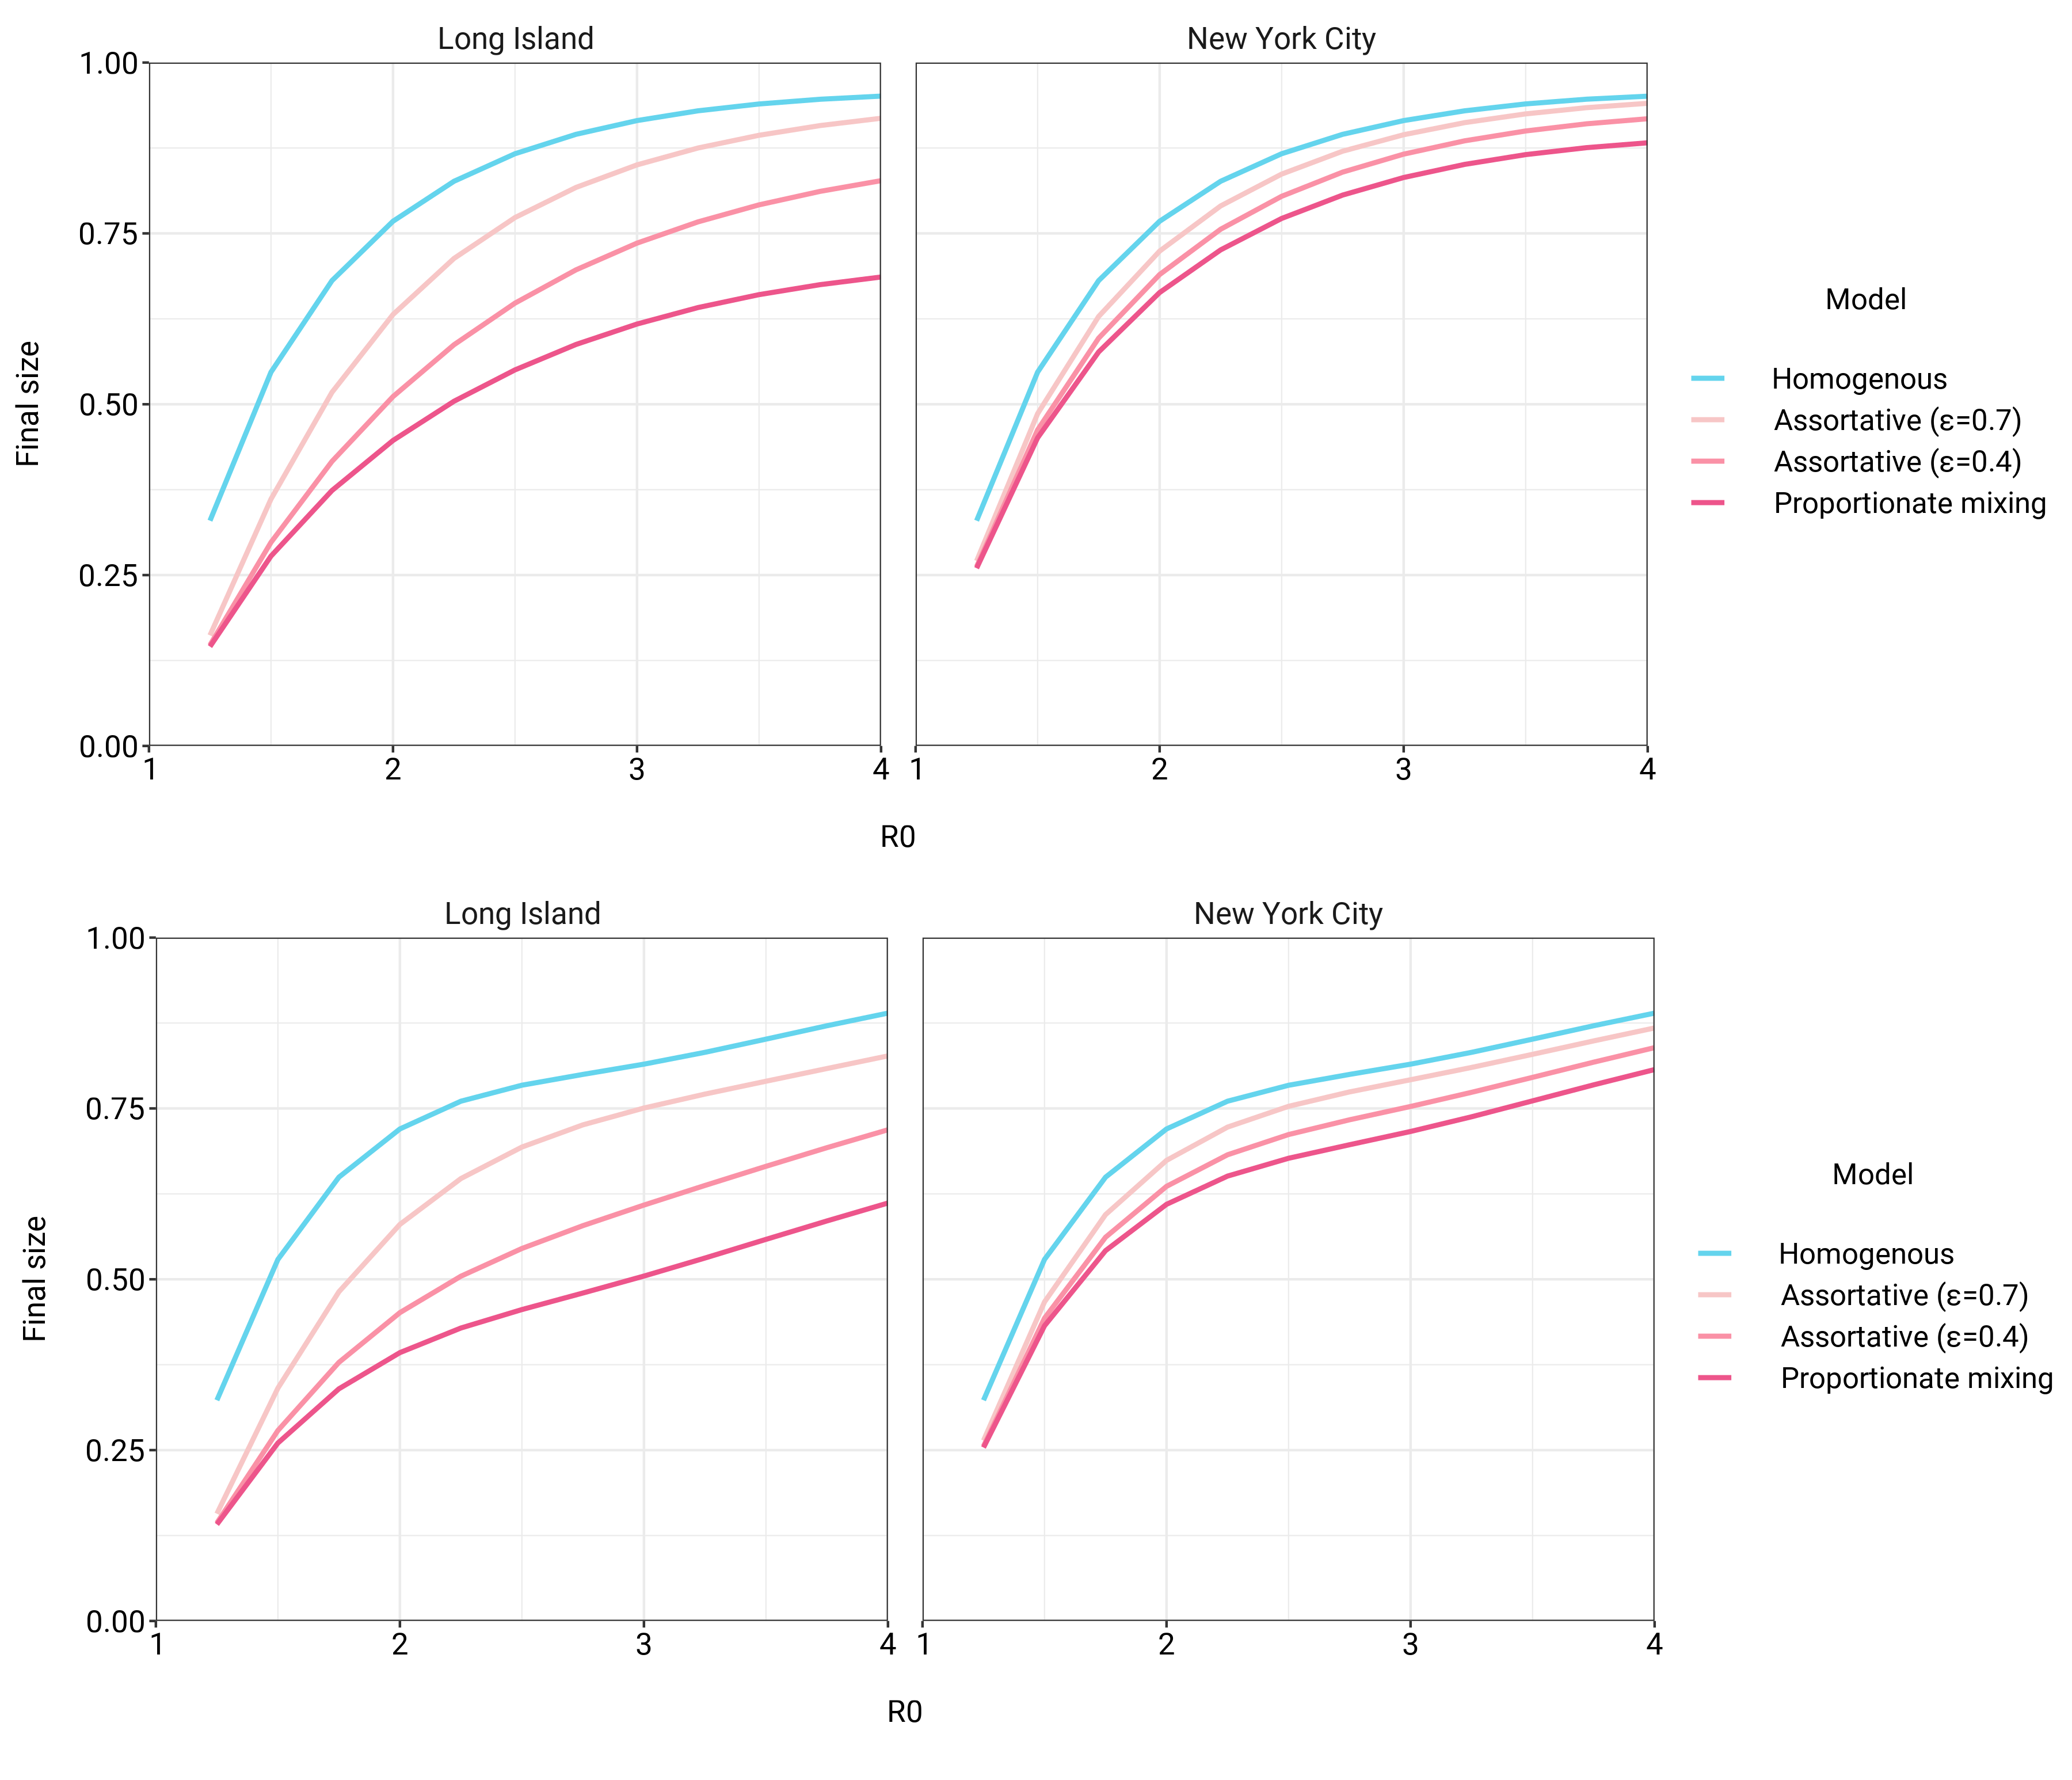

Supplement: supp [file elife-66601-supp-v2.zip › elife_poa_e66601_Figure_1_figure_supplement_6.png]

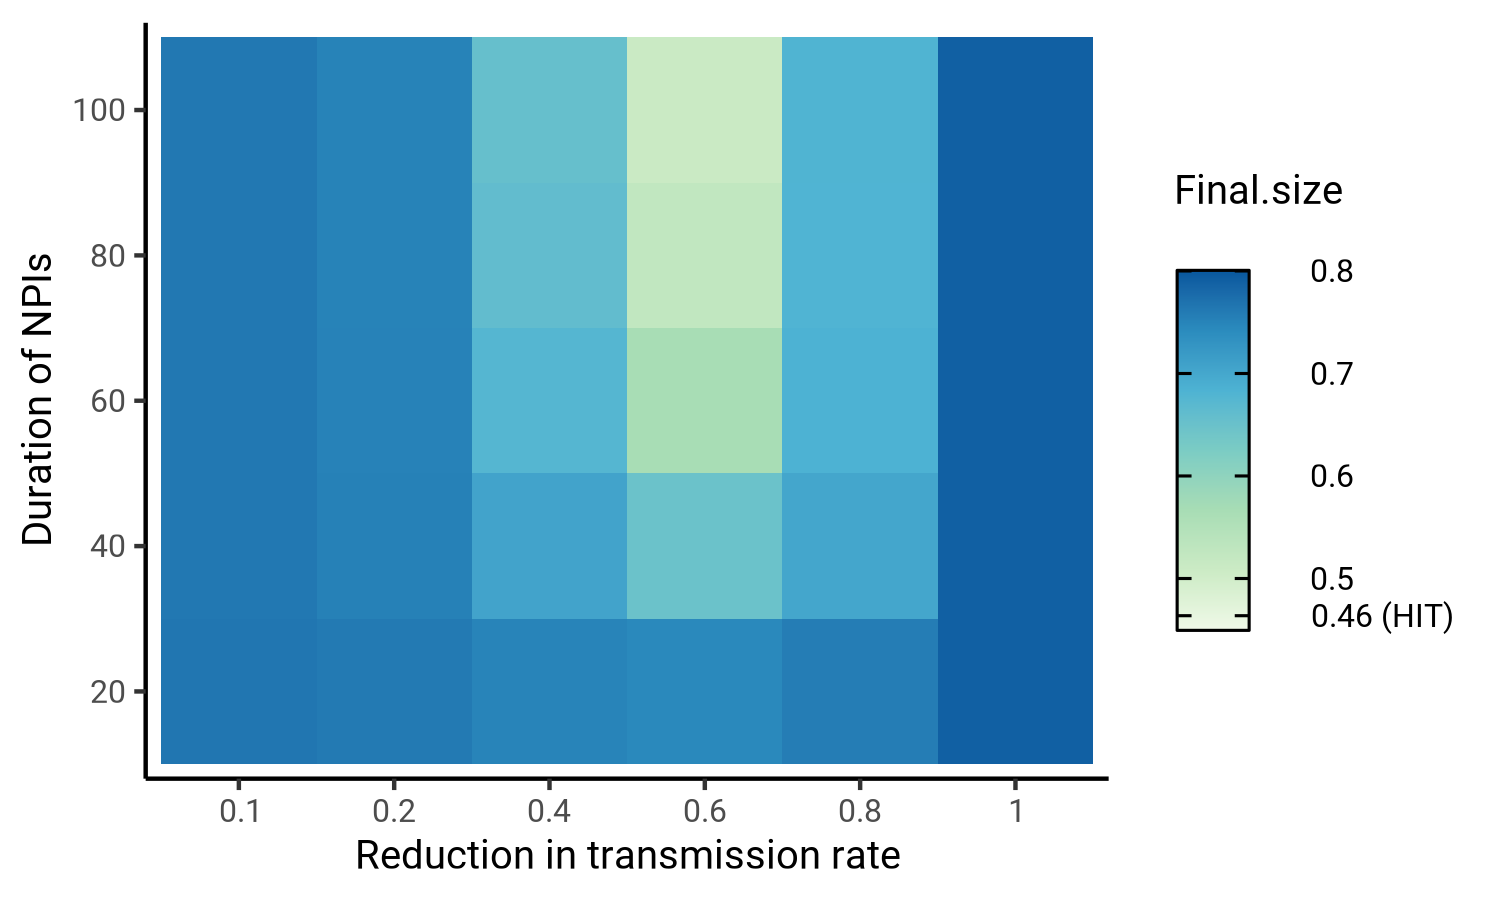

Supplement: supp [file elife-66601-supp-v2.zip › elife_poa_e66601_Figure_1_figure_supplement_7.png]

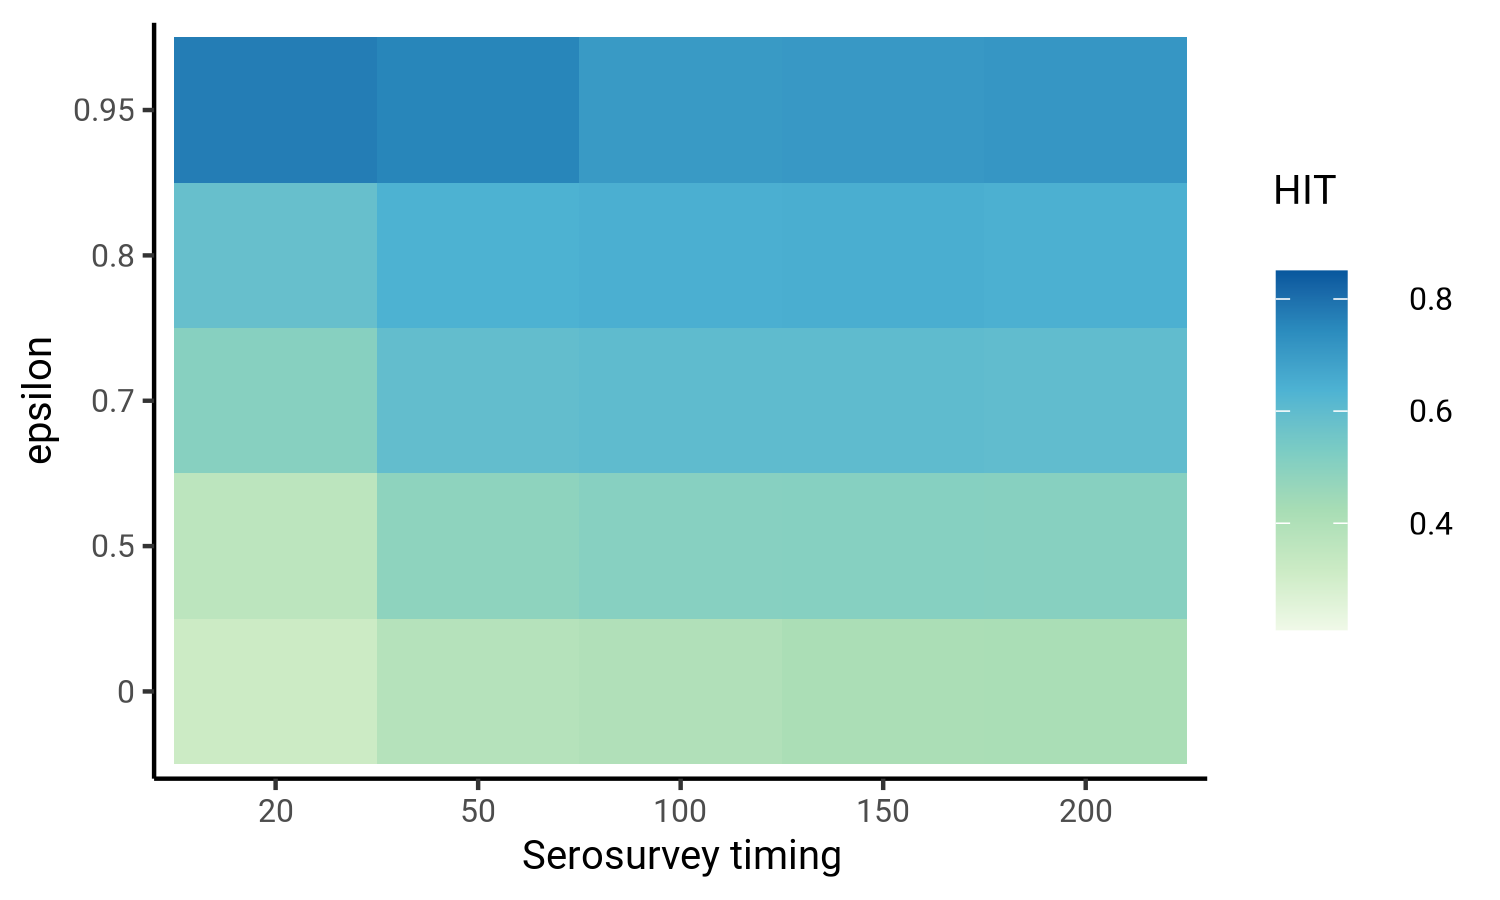

Supplement: supp [file elife-66601-supp-v2.zip › elife_poa_e66601_Figure_2_figure_supplement_1.png]

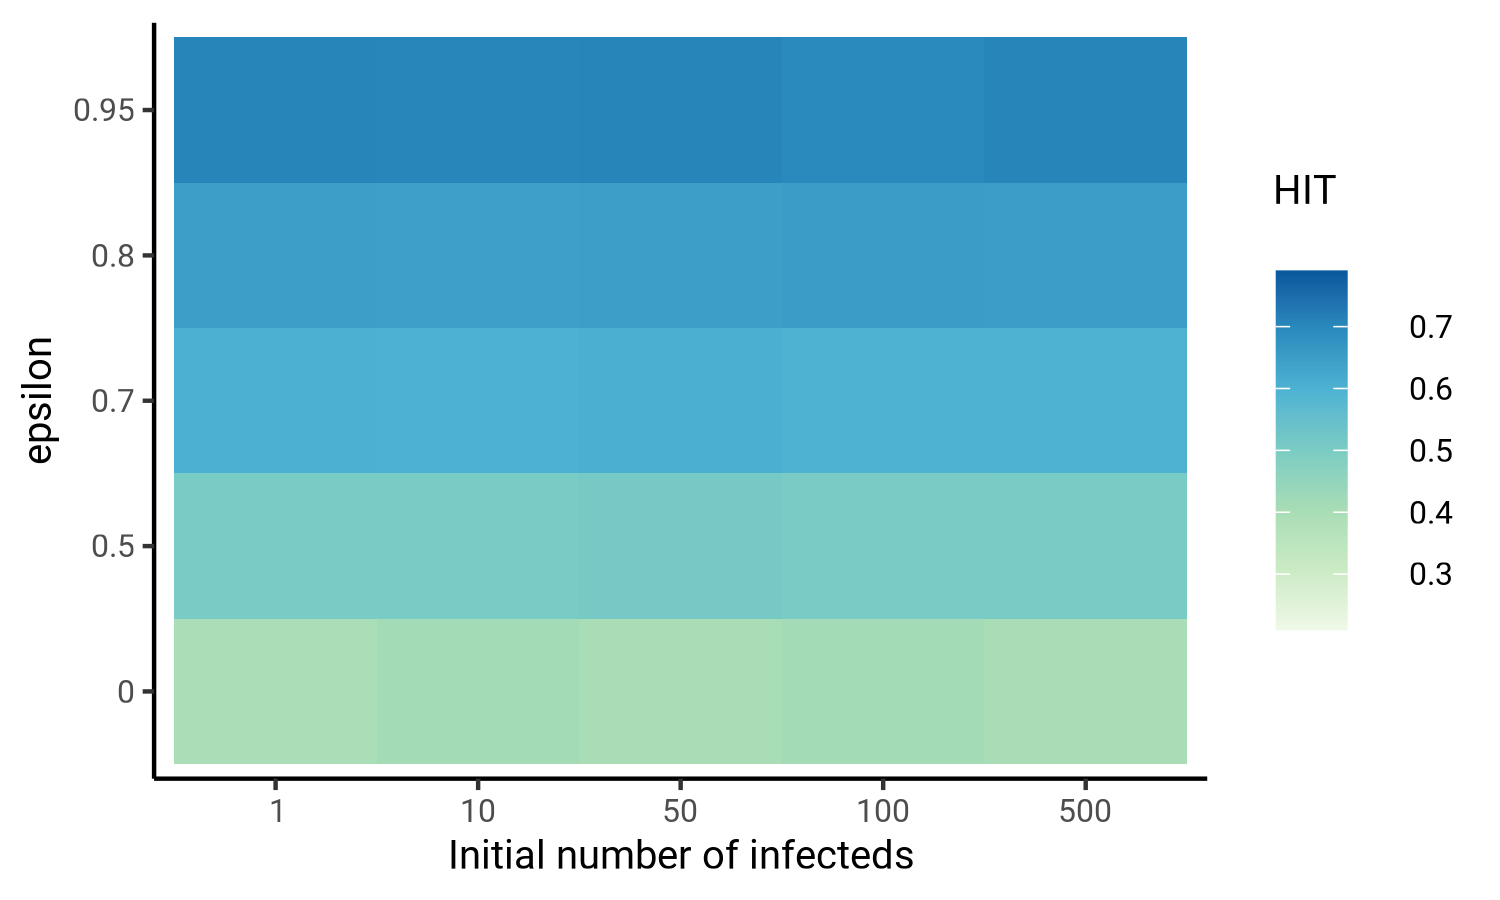

Supplement: supp [file elife-66601-supp-v2.zip › elife_poa_e66601_Figure_2_figure_supplement_2.png]

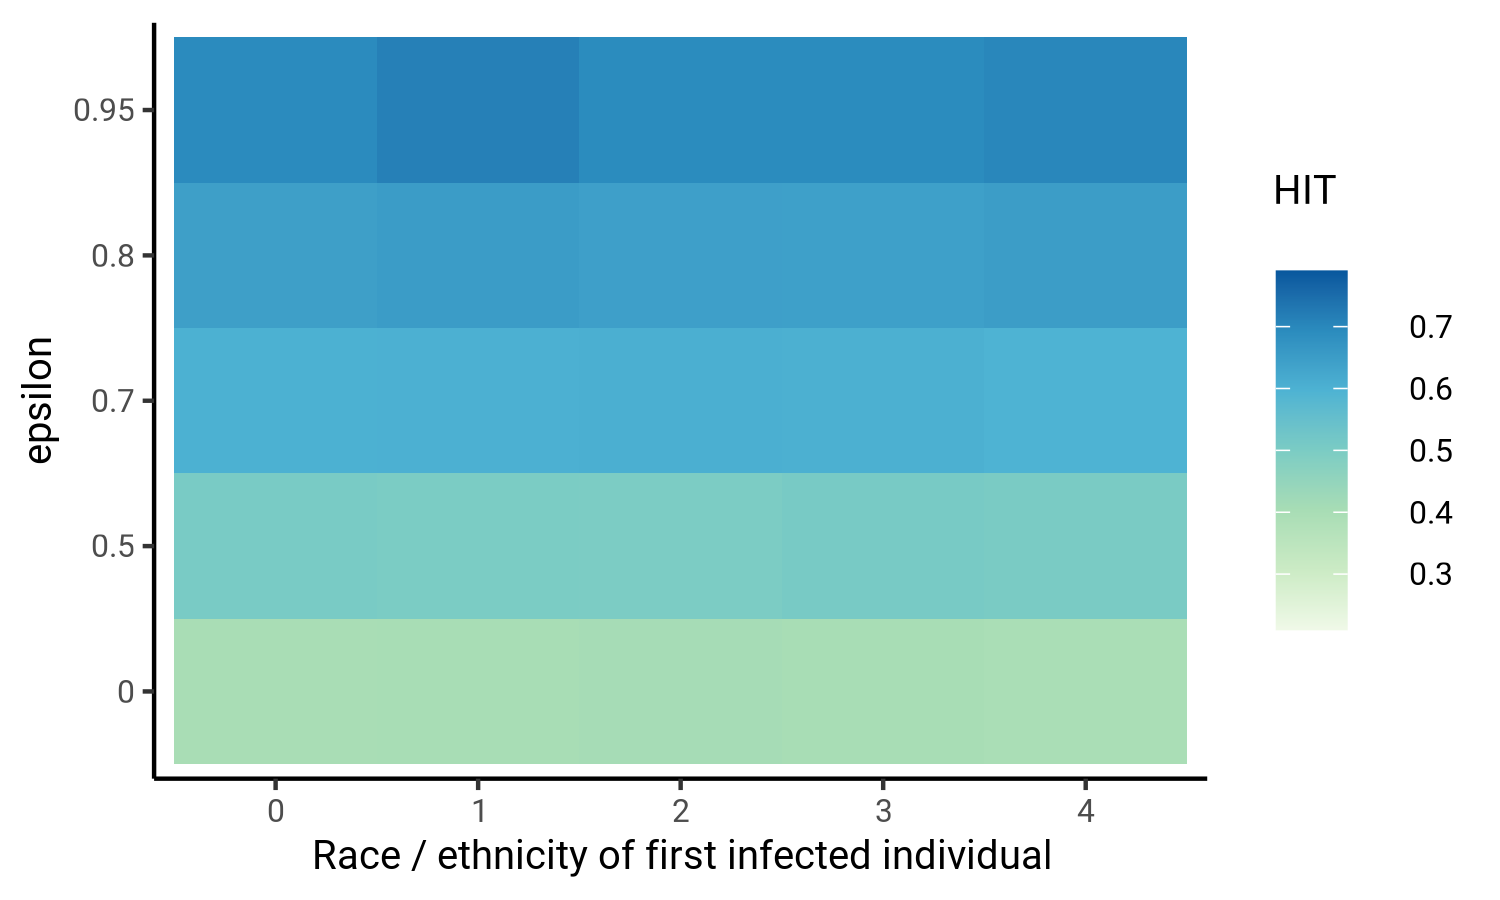

Supplement: supp [file elife-66601-supp-v2.zip › elife_poa_e66601_Figure_2_figure_supplement_3.png]

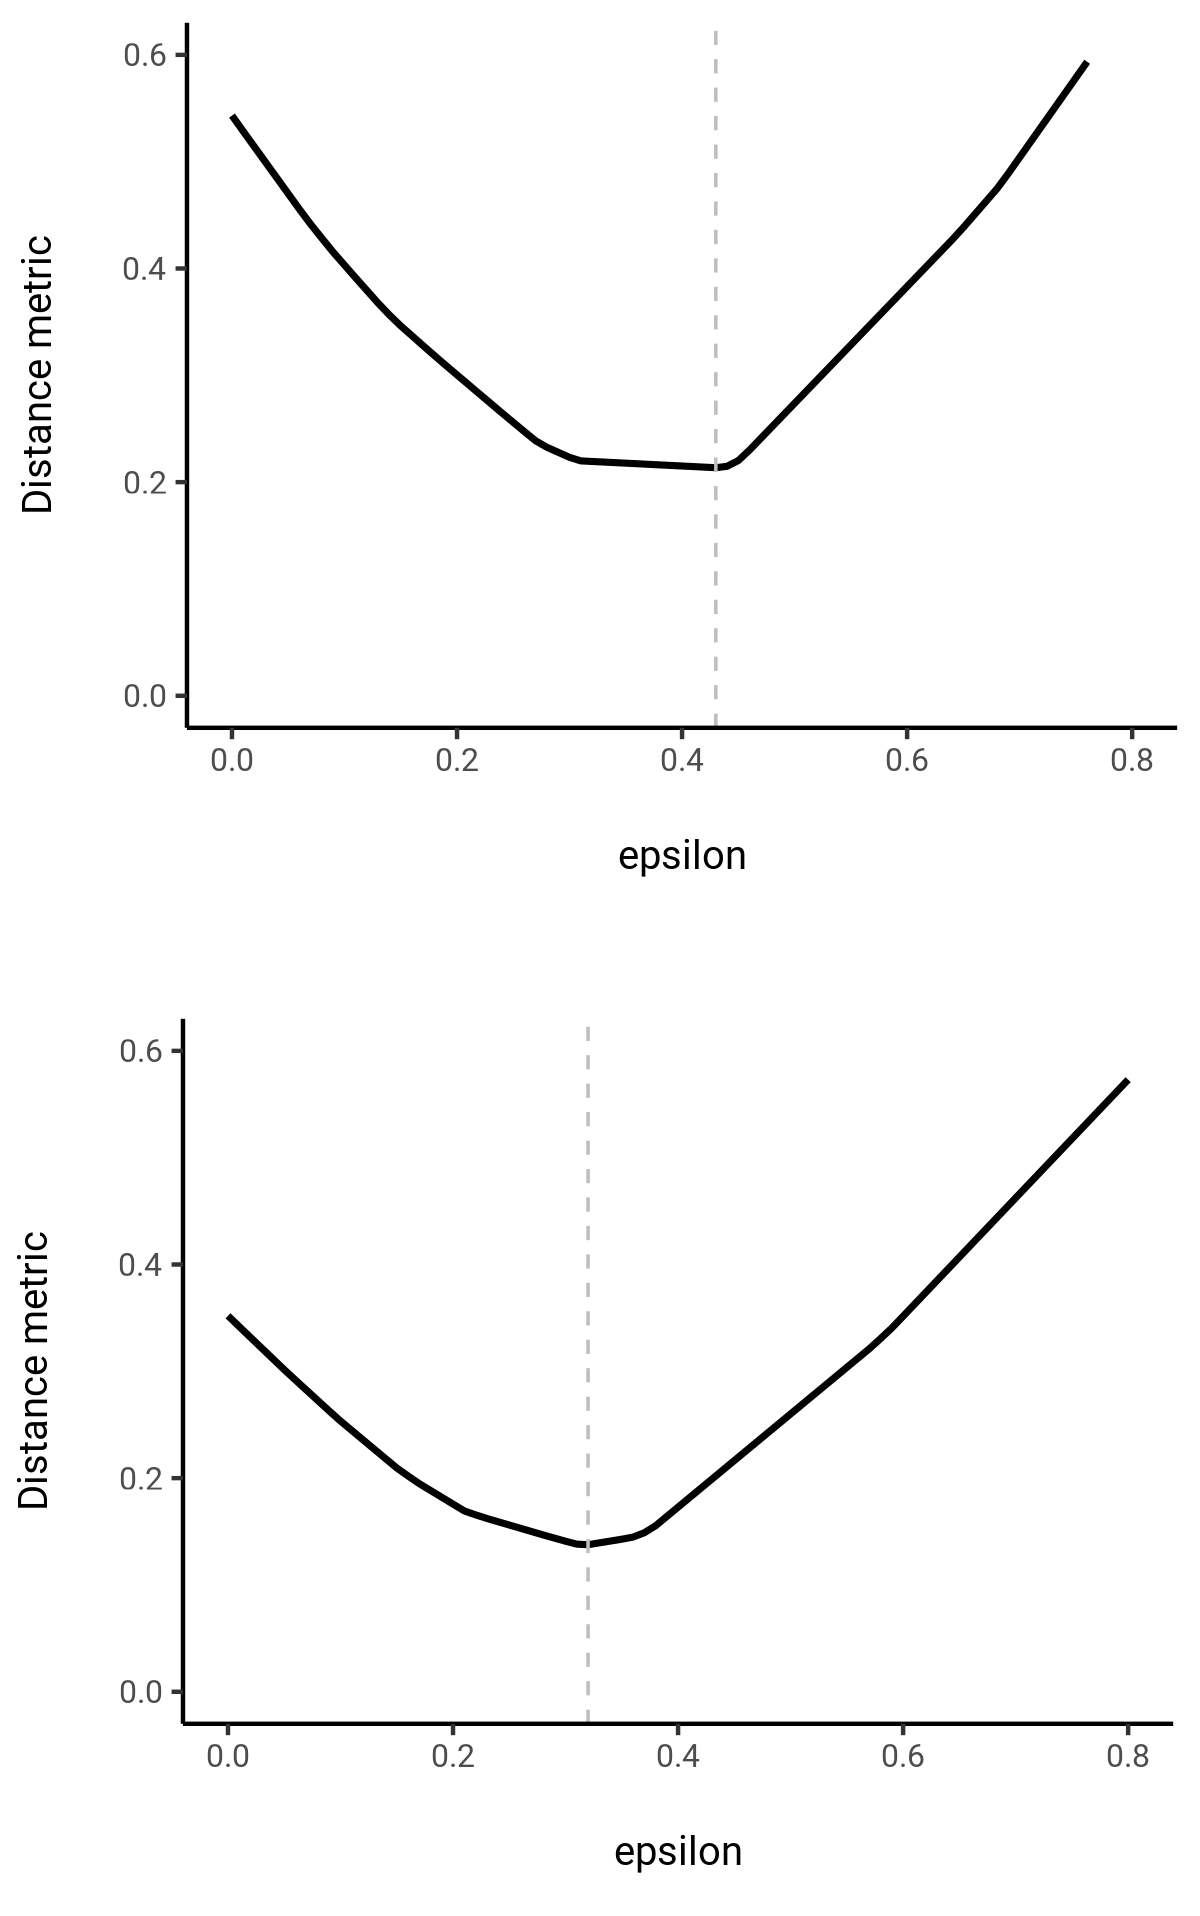

Supplement: supp [file elife-66601-supp-v2.zip › elife_poa_e66601_Figure_2_figure_supplement_4.png]

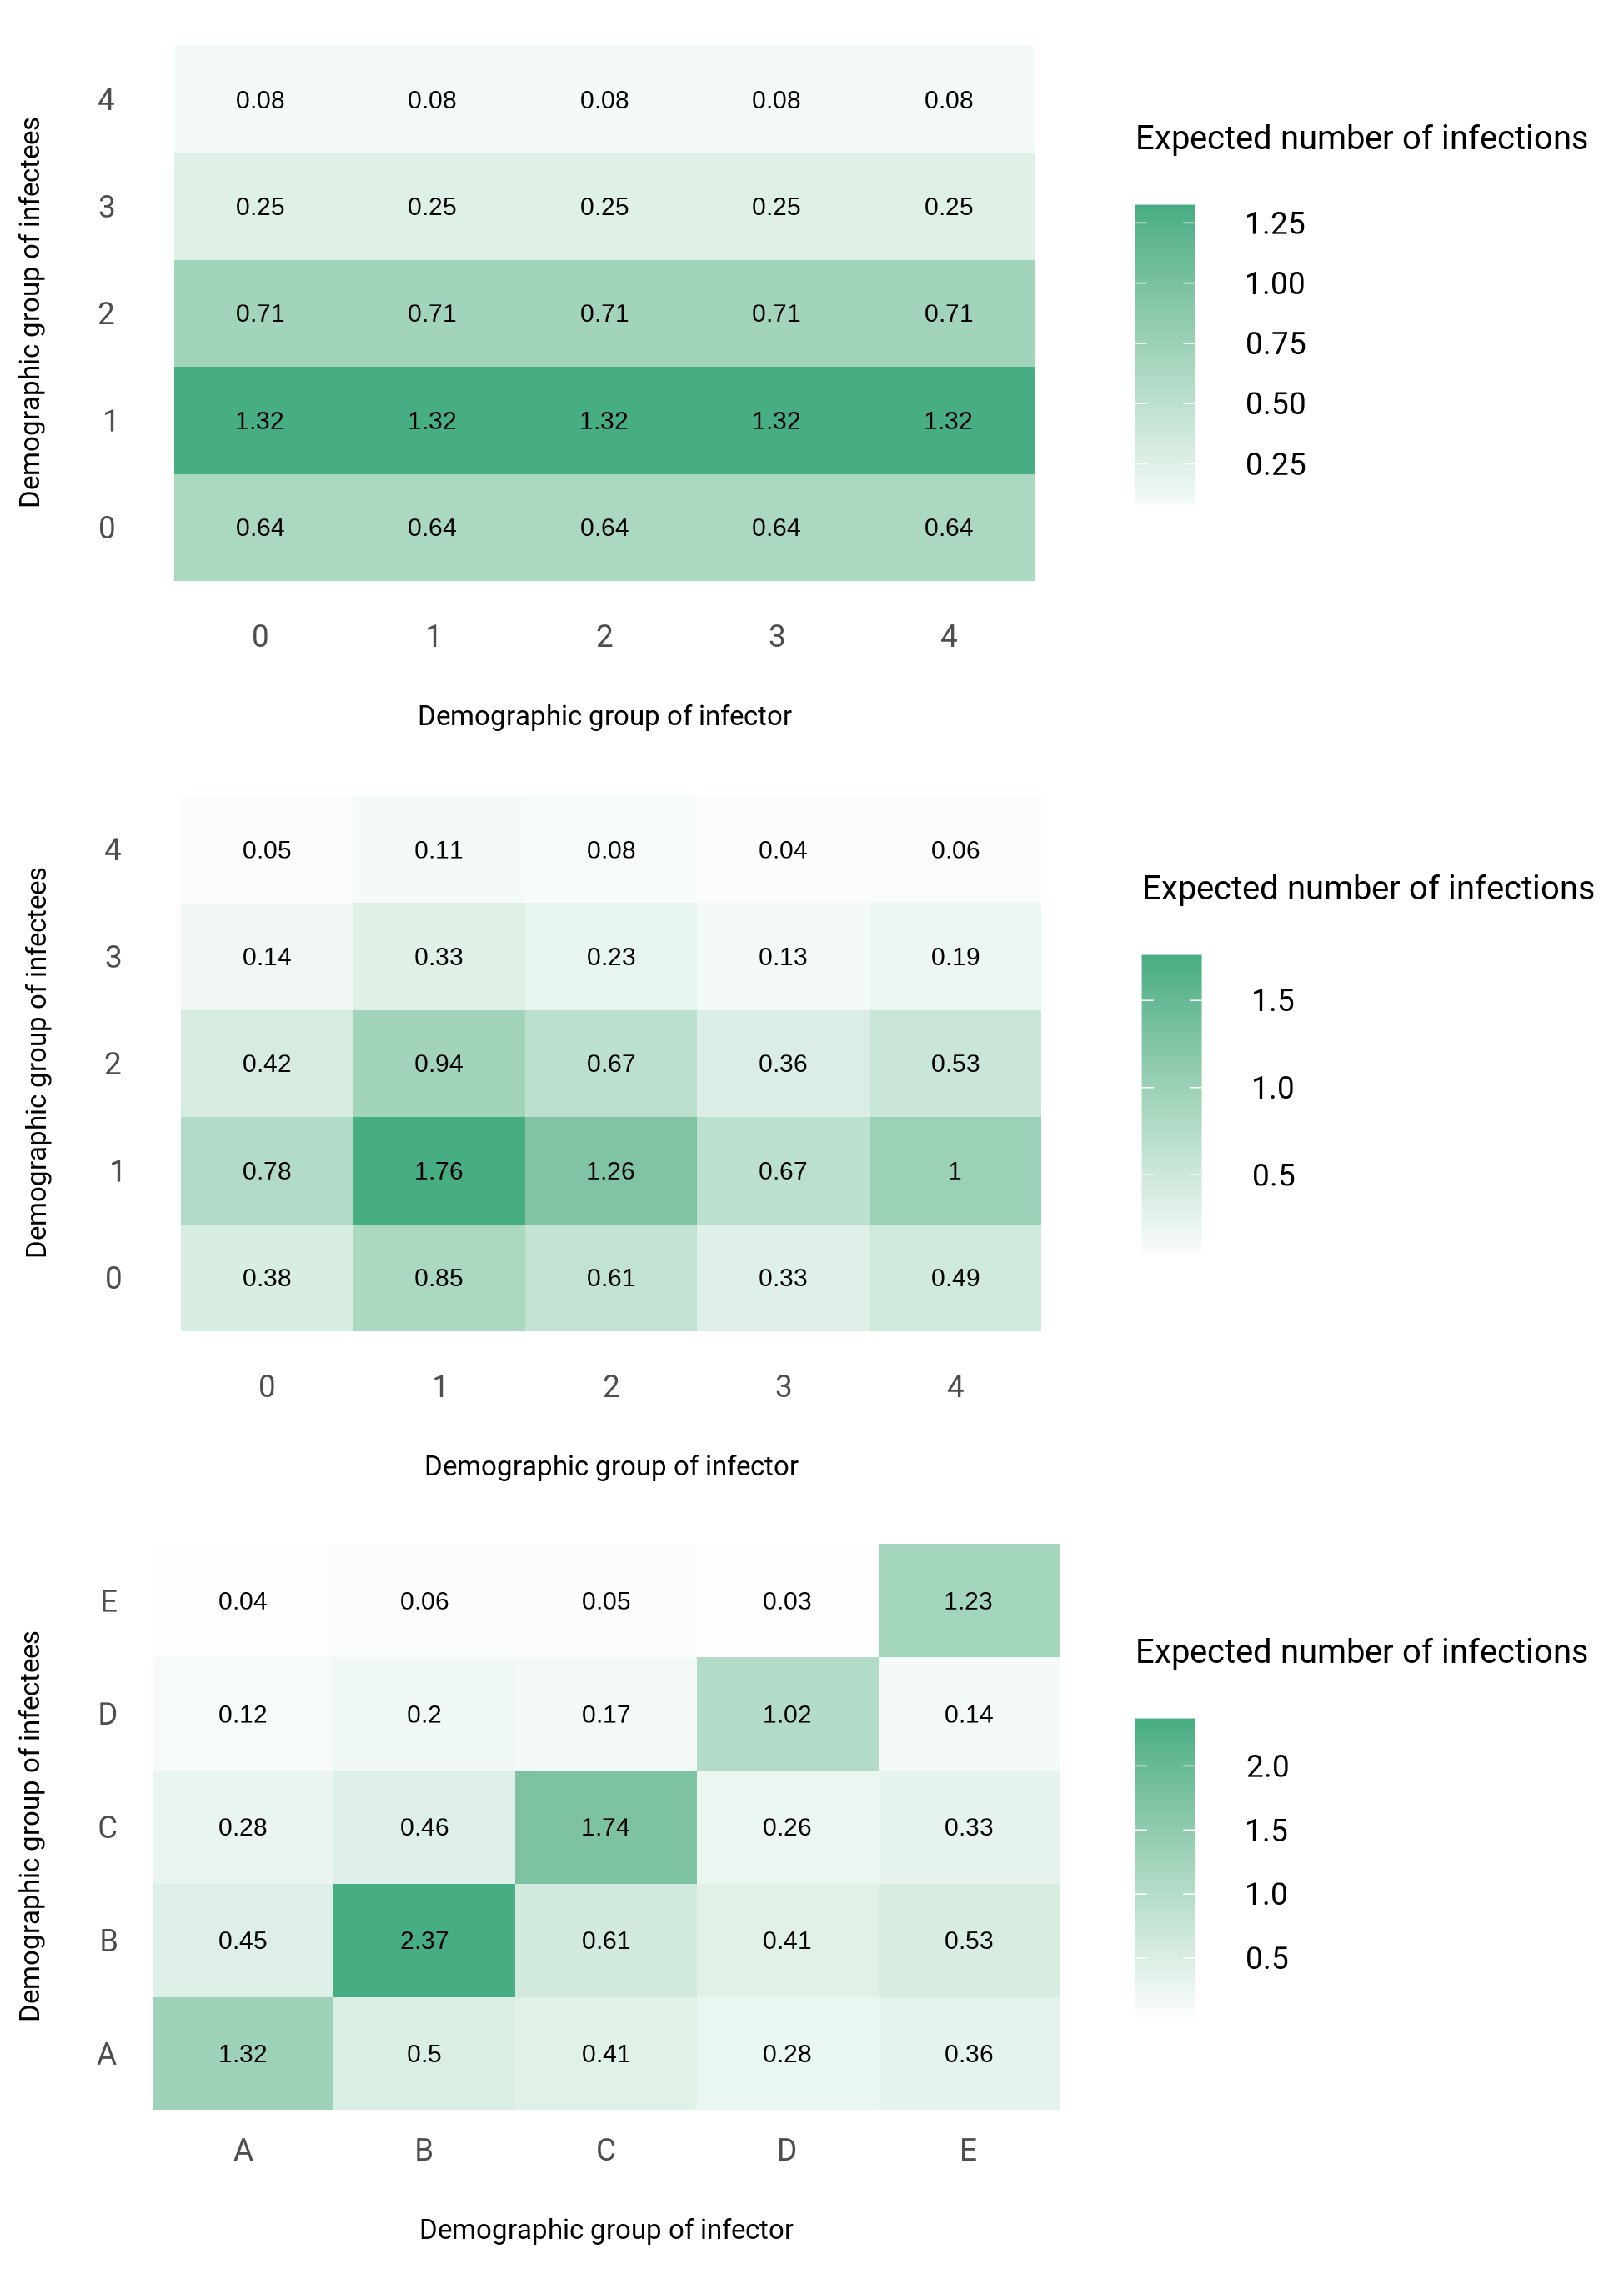

Supplement: supp [file elife-66601-supp-v2.zip › elife_poa_e66601_Figure_2_figure_supplement_5.png]

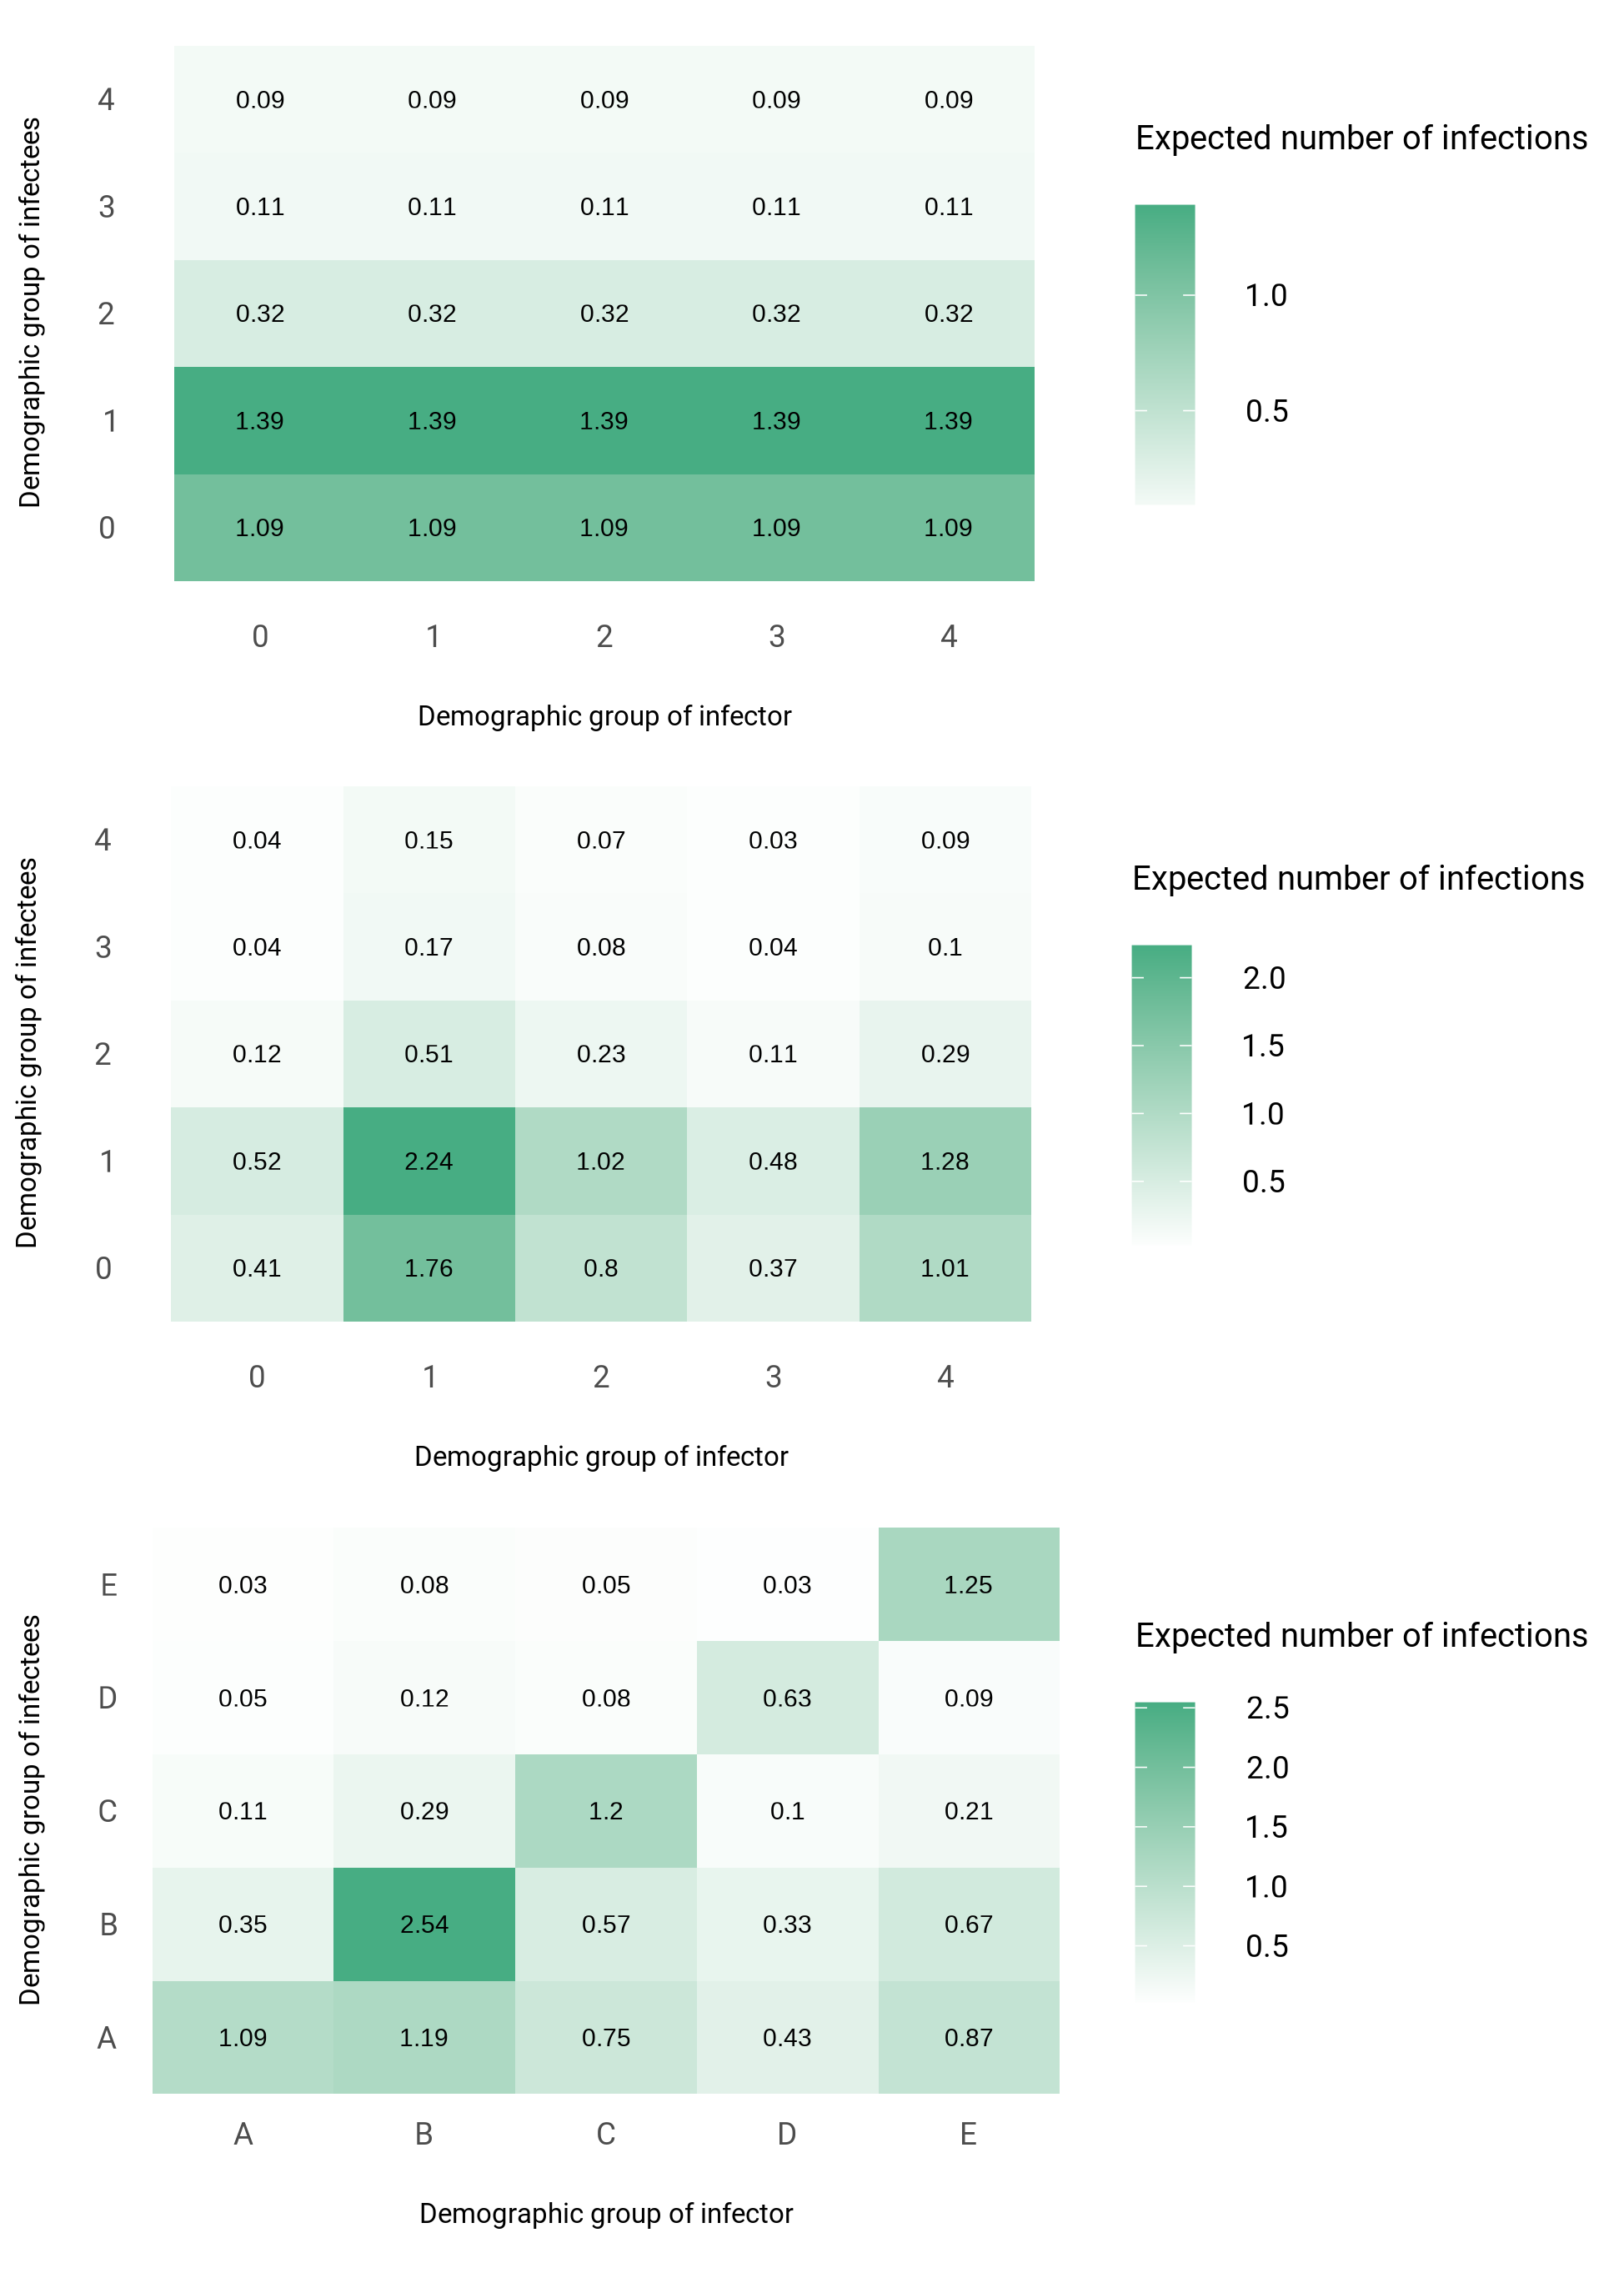

Supplement: supp [file elife-66601-supp-v2.zip › elife_poa_e66601_Figure_2_figure_supplement_6.png]

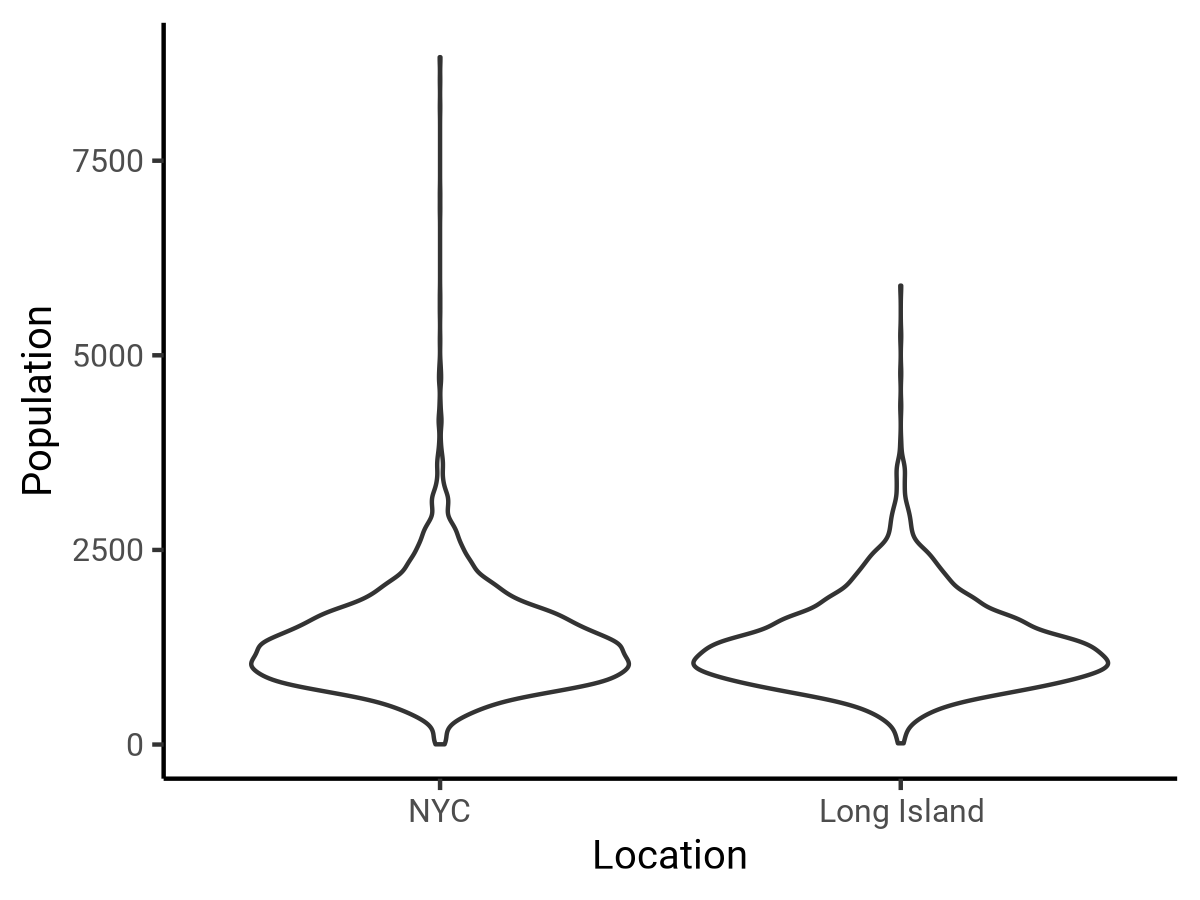

Supplement: supp [file elife-66601-supp-v2.zip › elife_poa_e66601_Figure_2_figure_supplement_7.png]

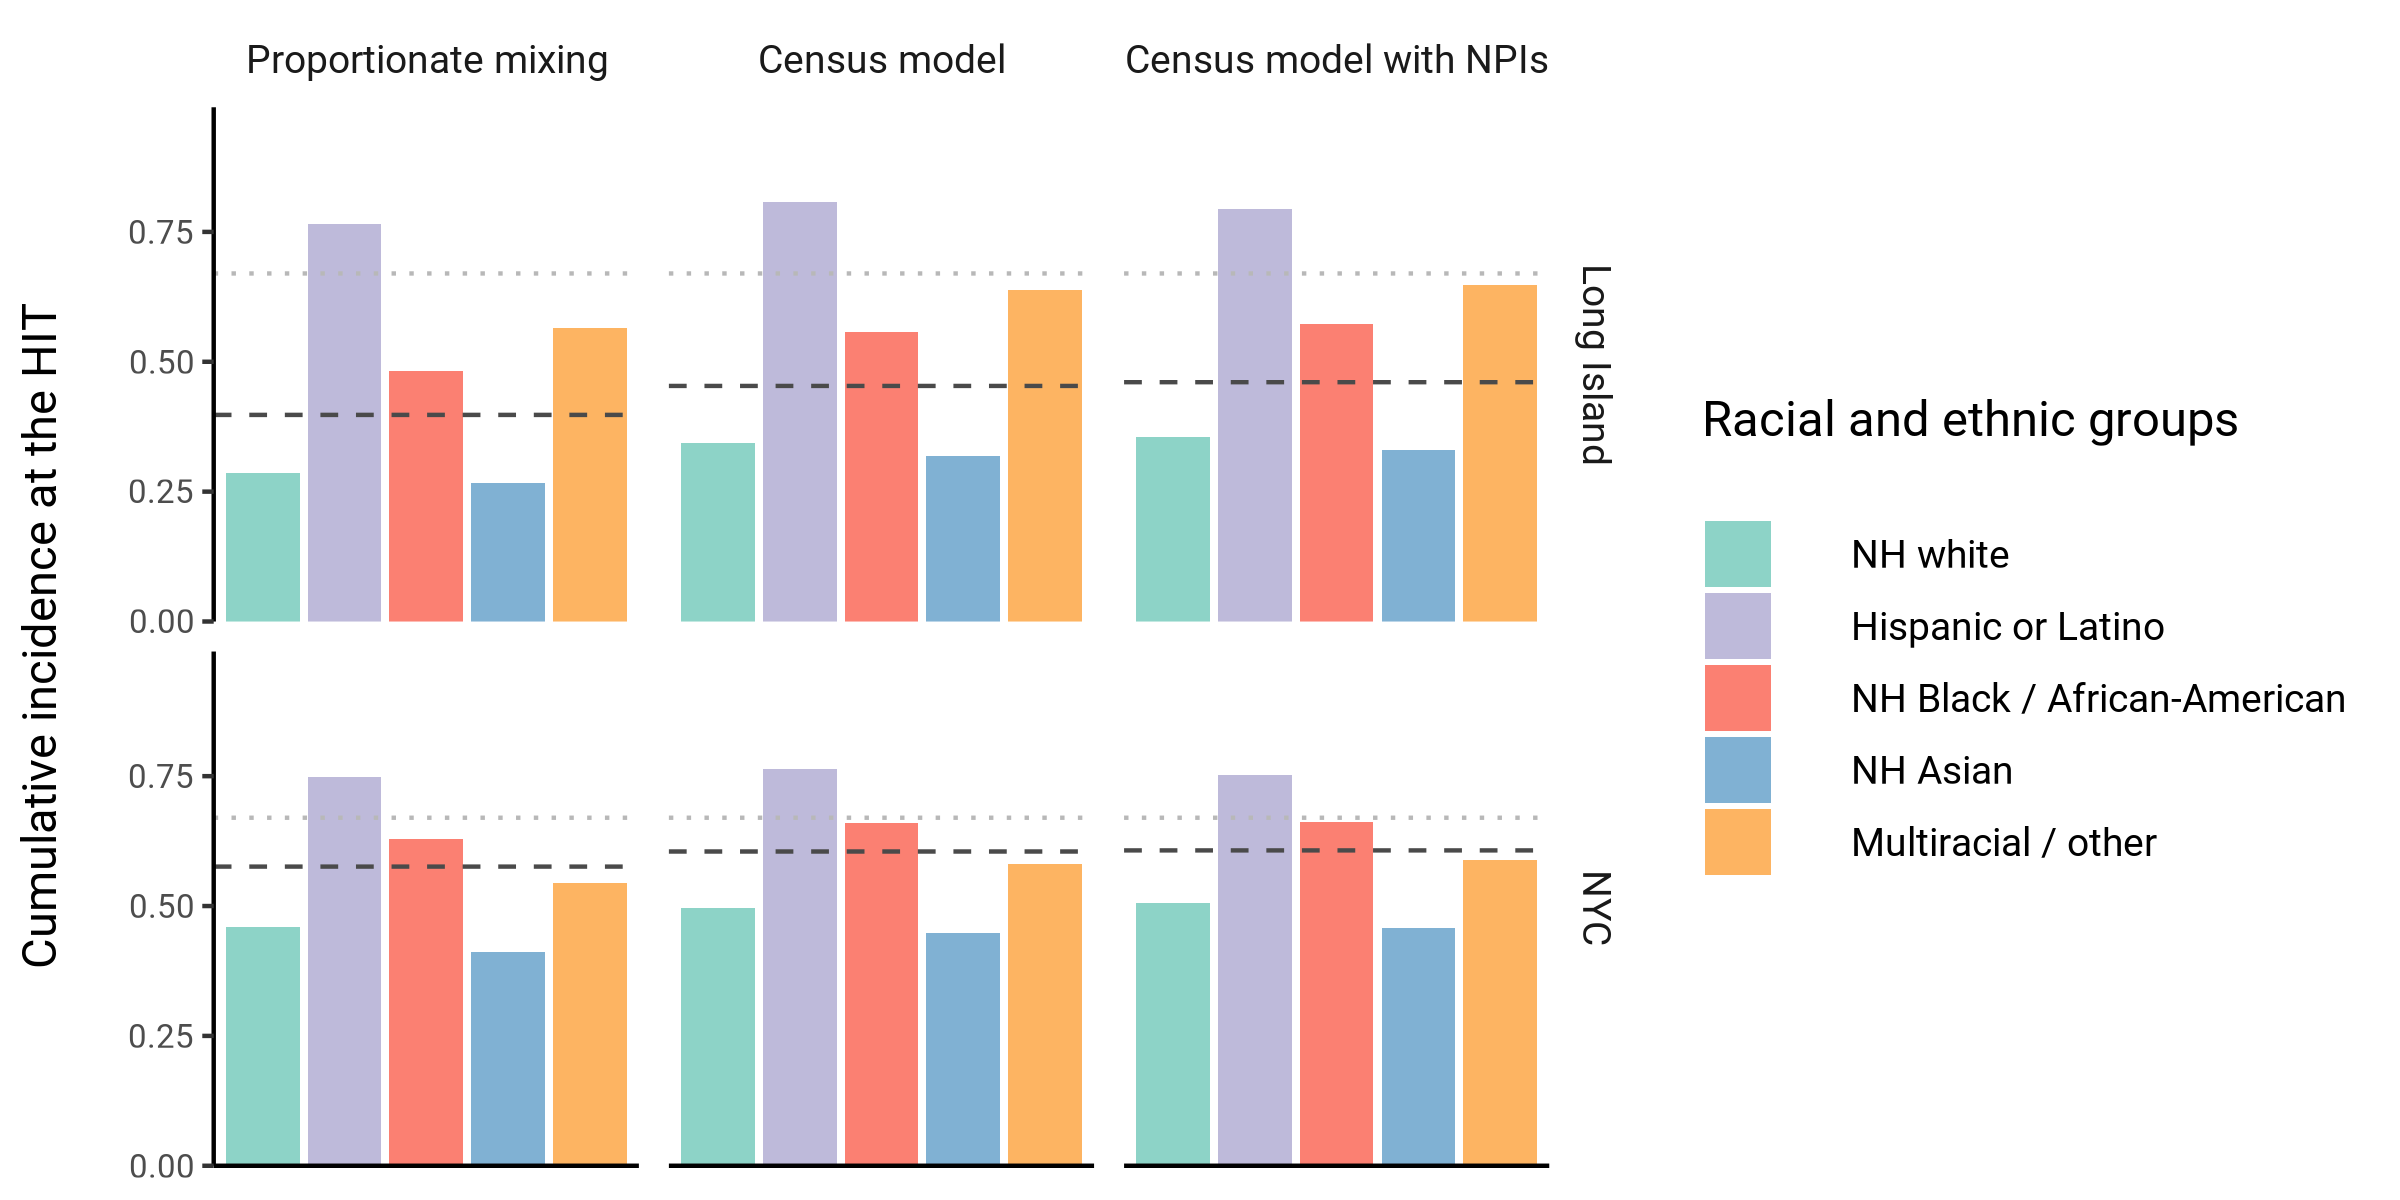

Supplement: supp [file elife-66601-supp-v2.zip › elife_poa_e66601_Figure_2_figure_supplement_8.png]

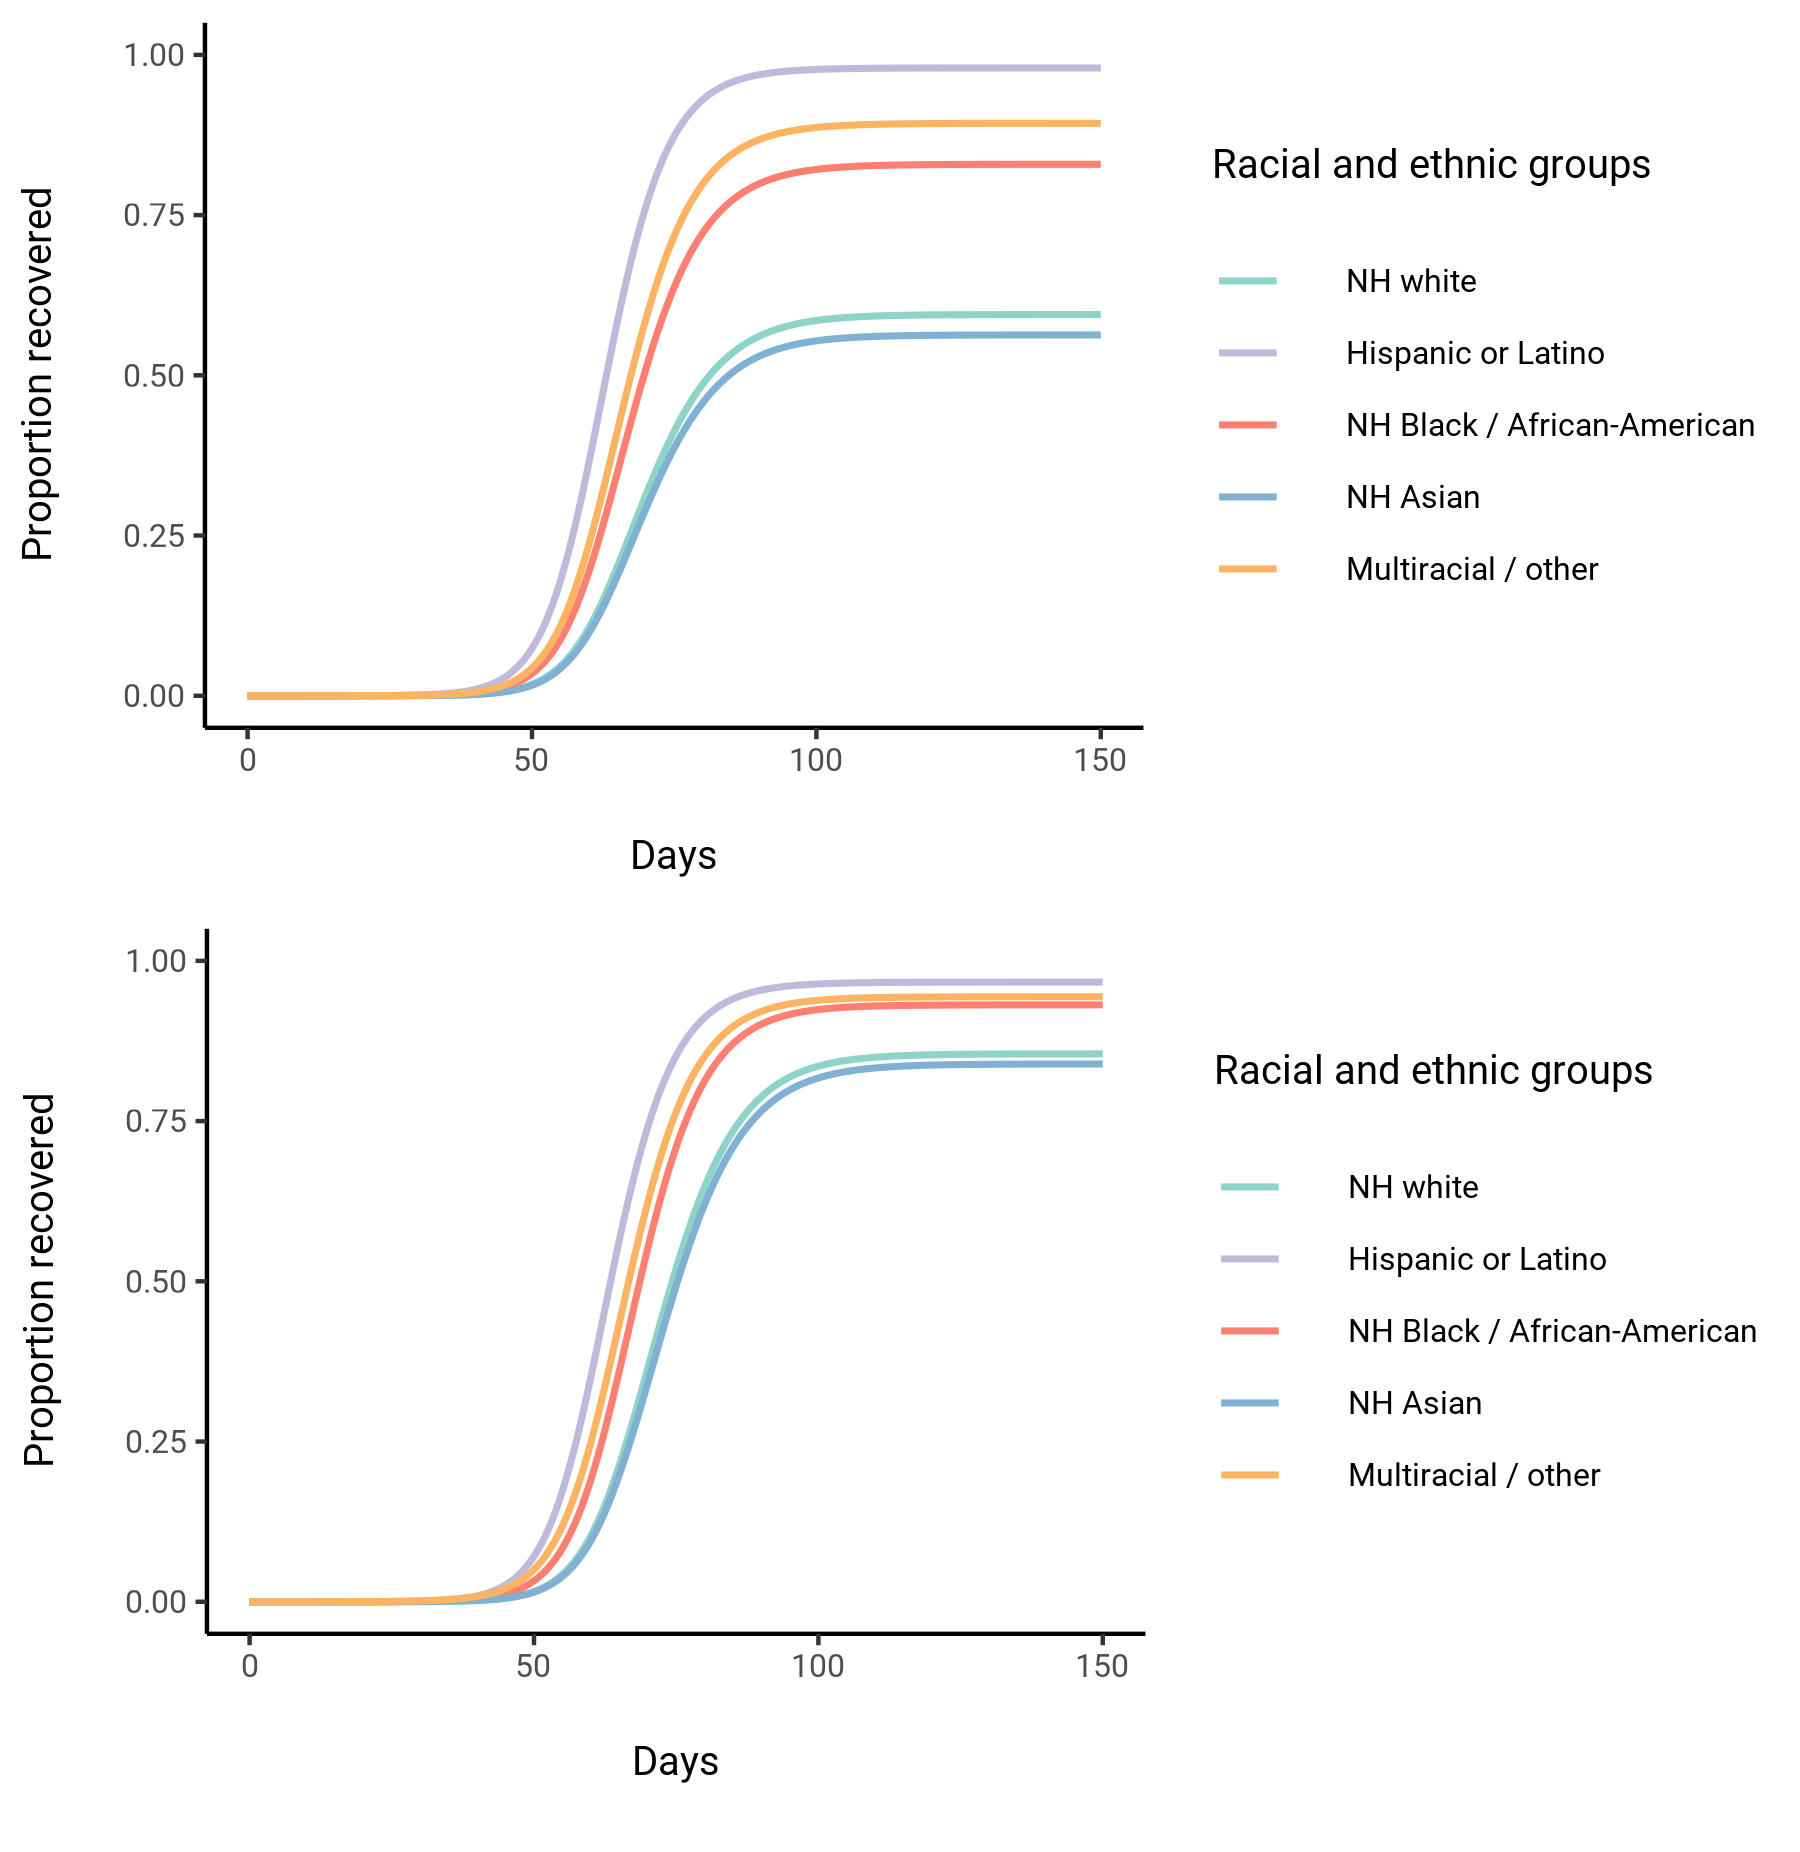

Supplement: supp [file elife-66601-supp-v2.zip › elife_poa_e66601_Figure_3_figure_supplement_1.png]

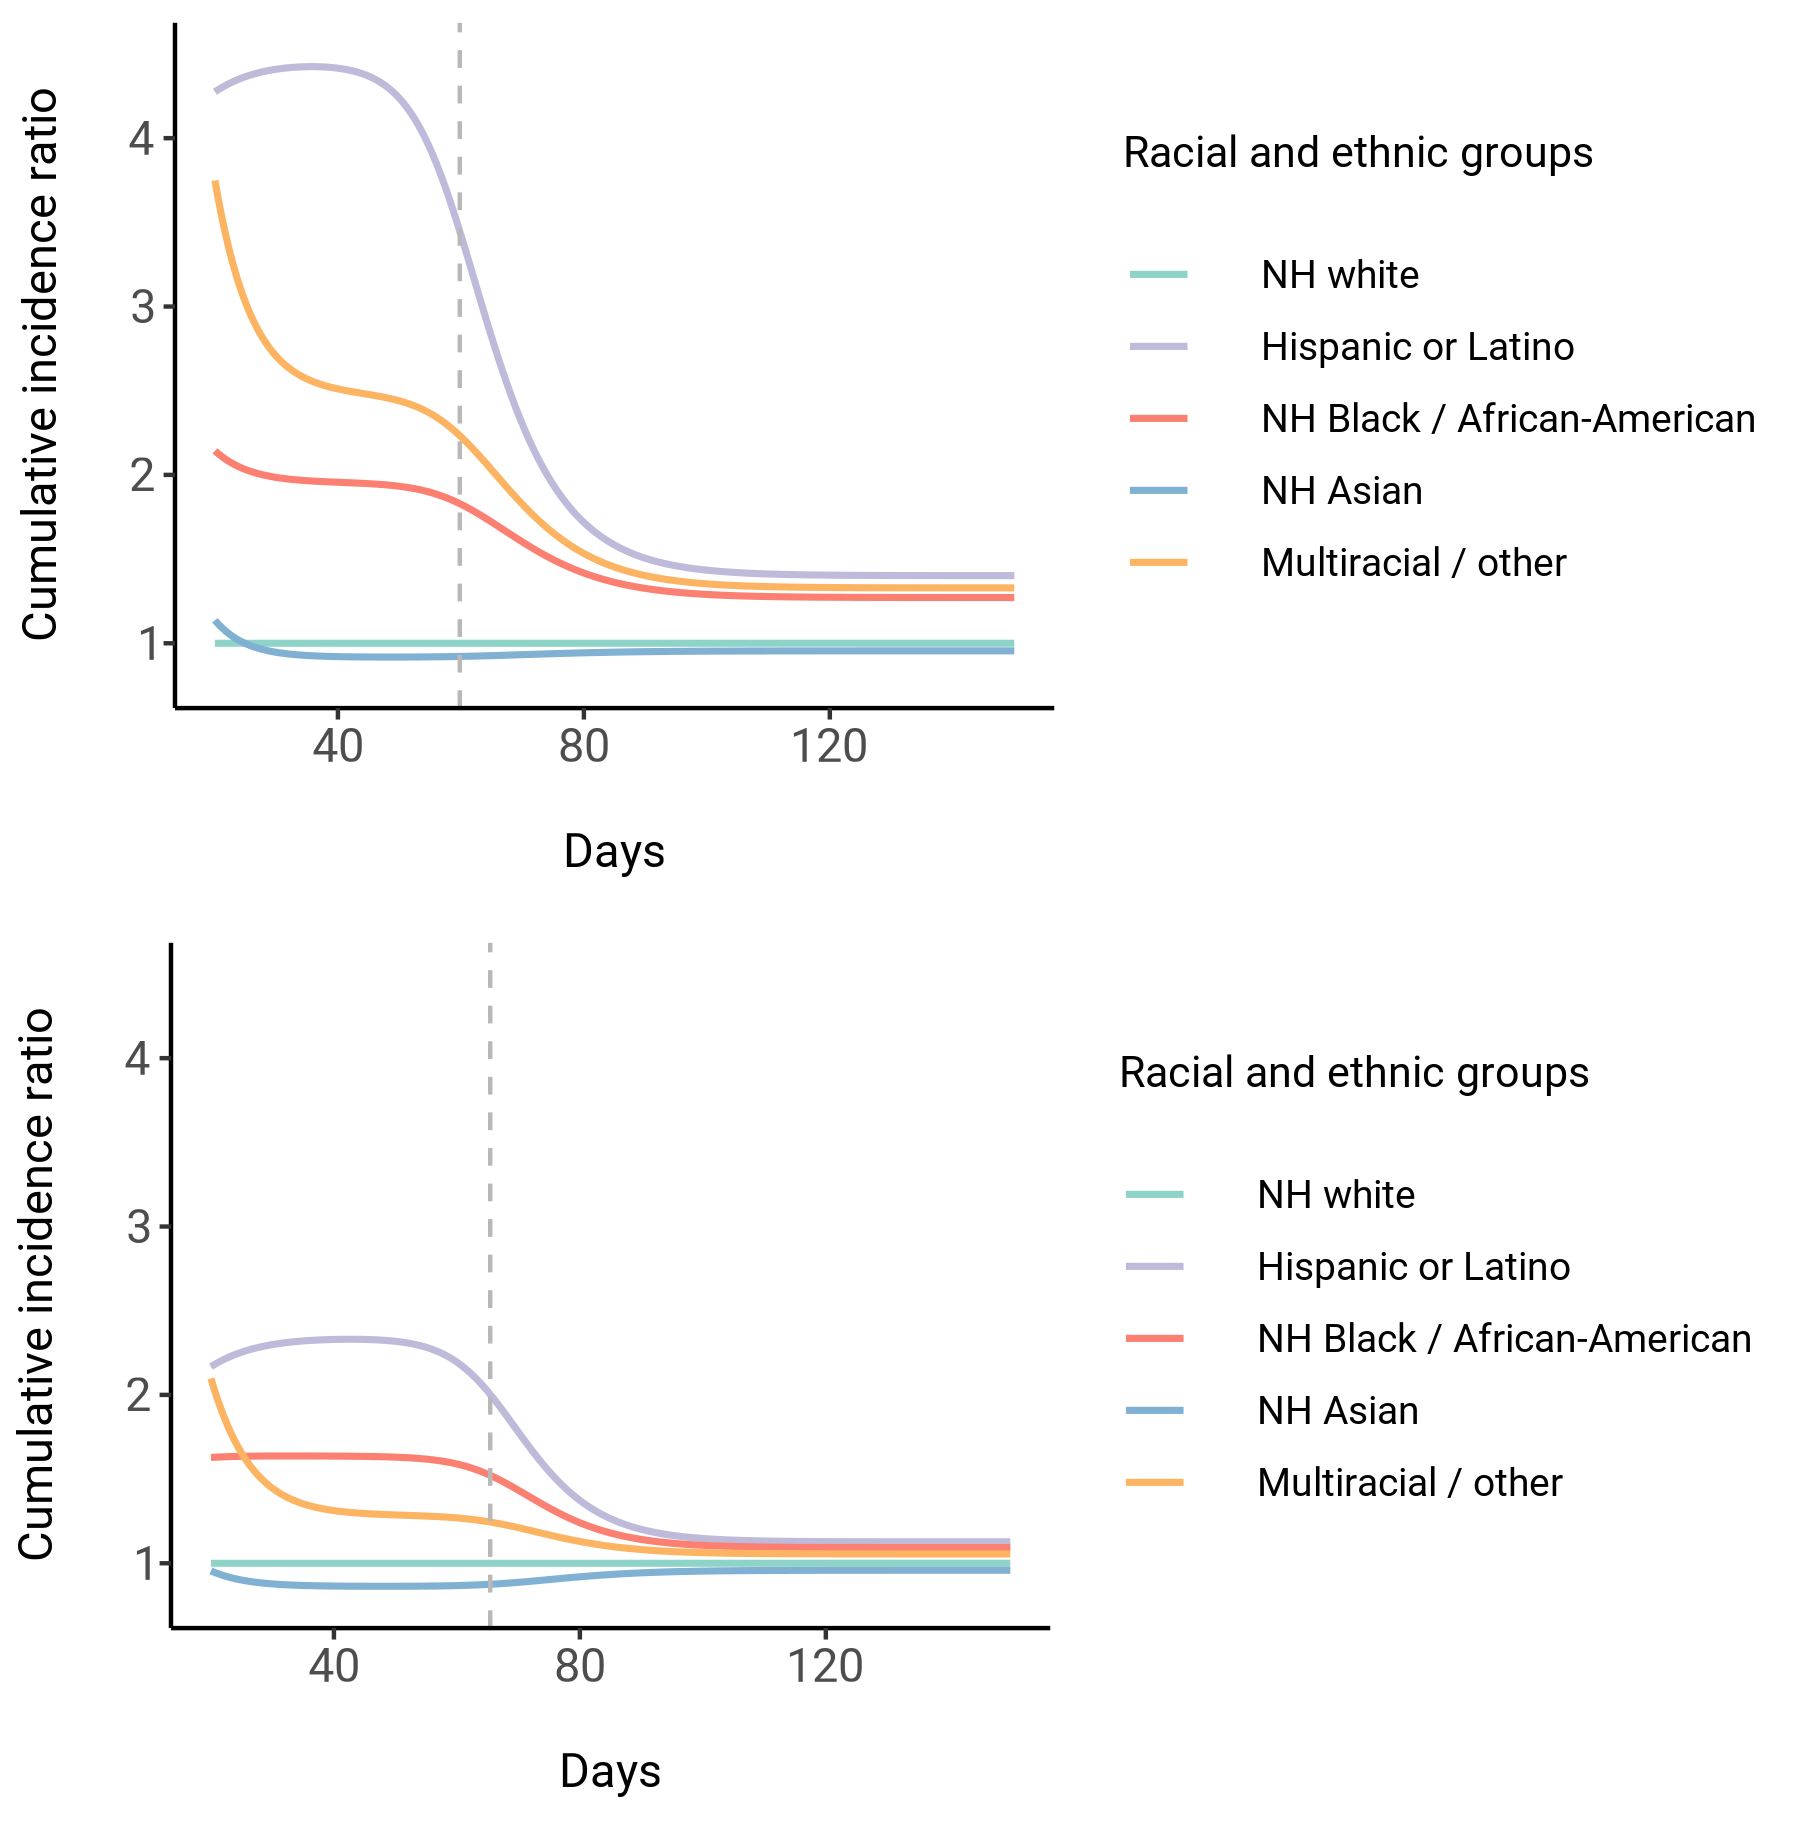

Supplement: supp [file elife-66601-supp-v2.zip › elife_poa_e66601_Figure_3_figure_supplement_2.png]

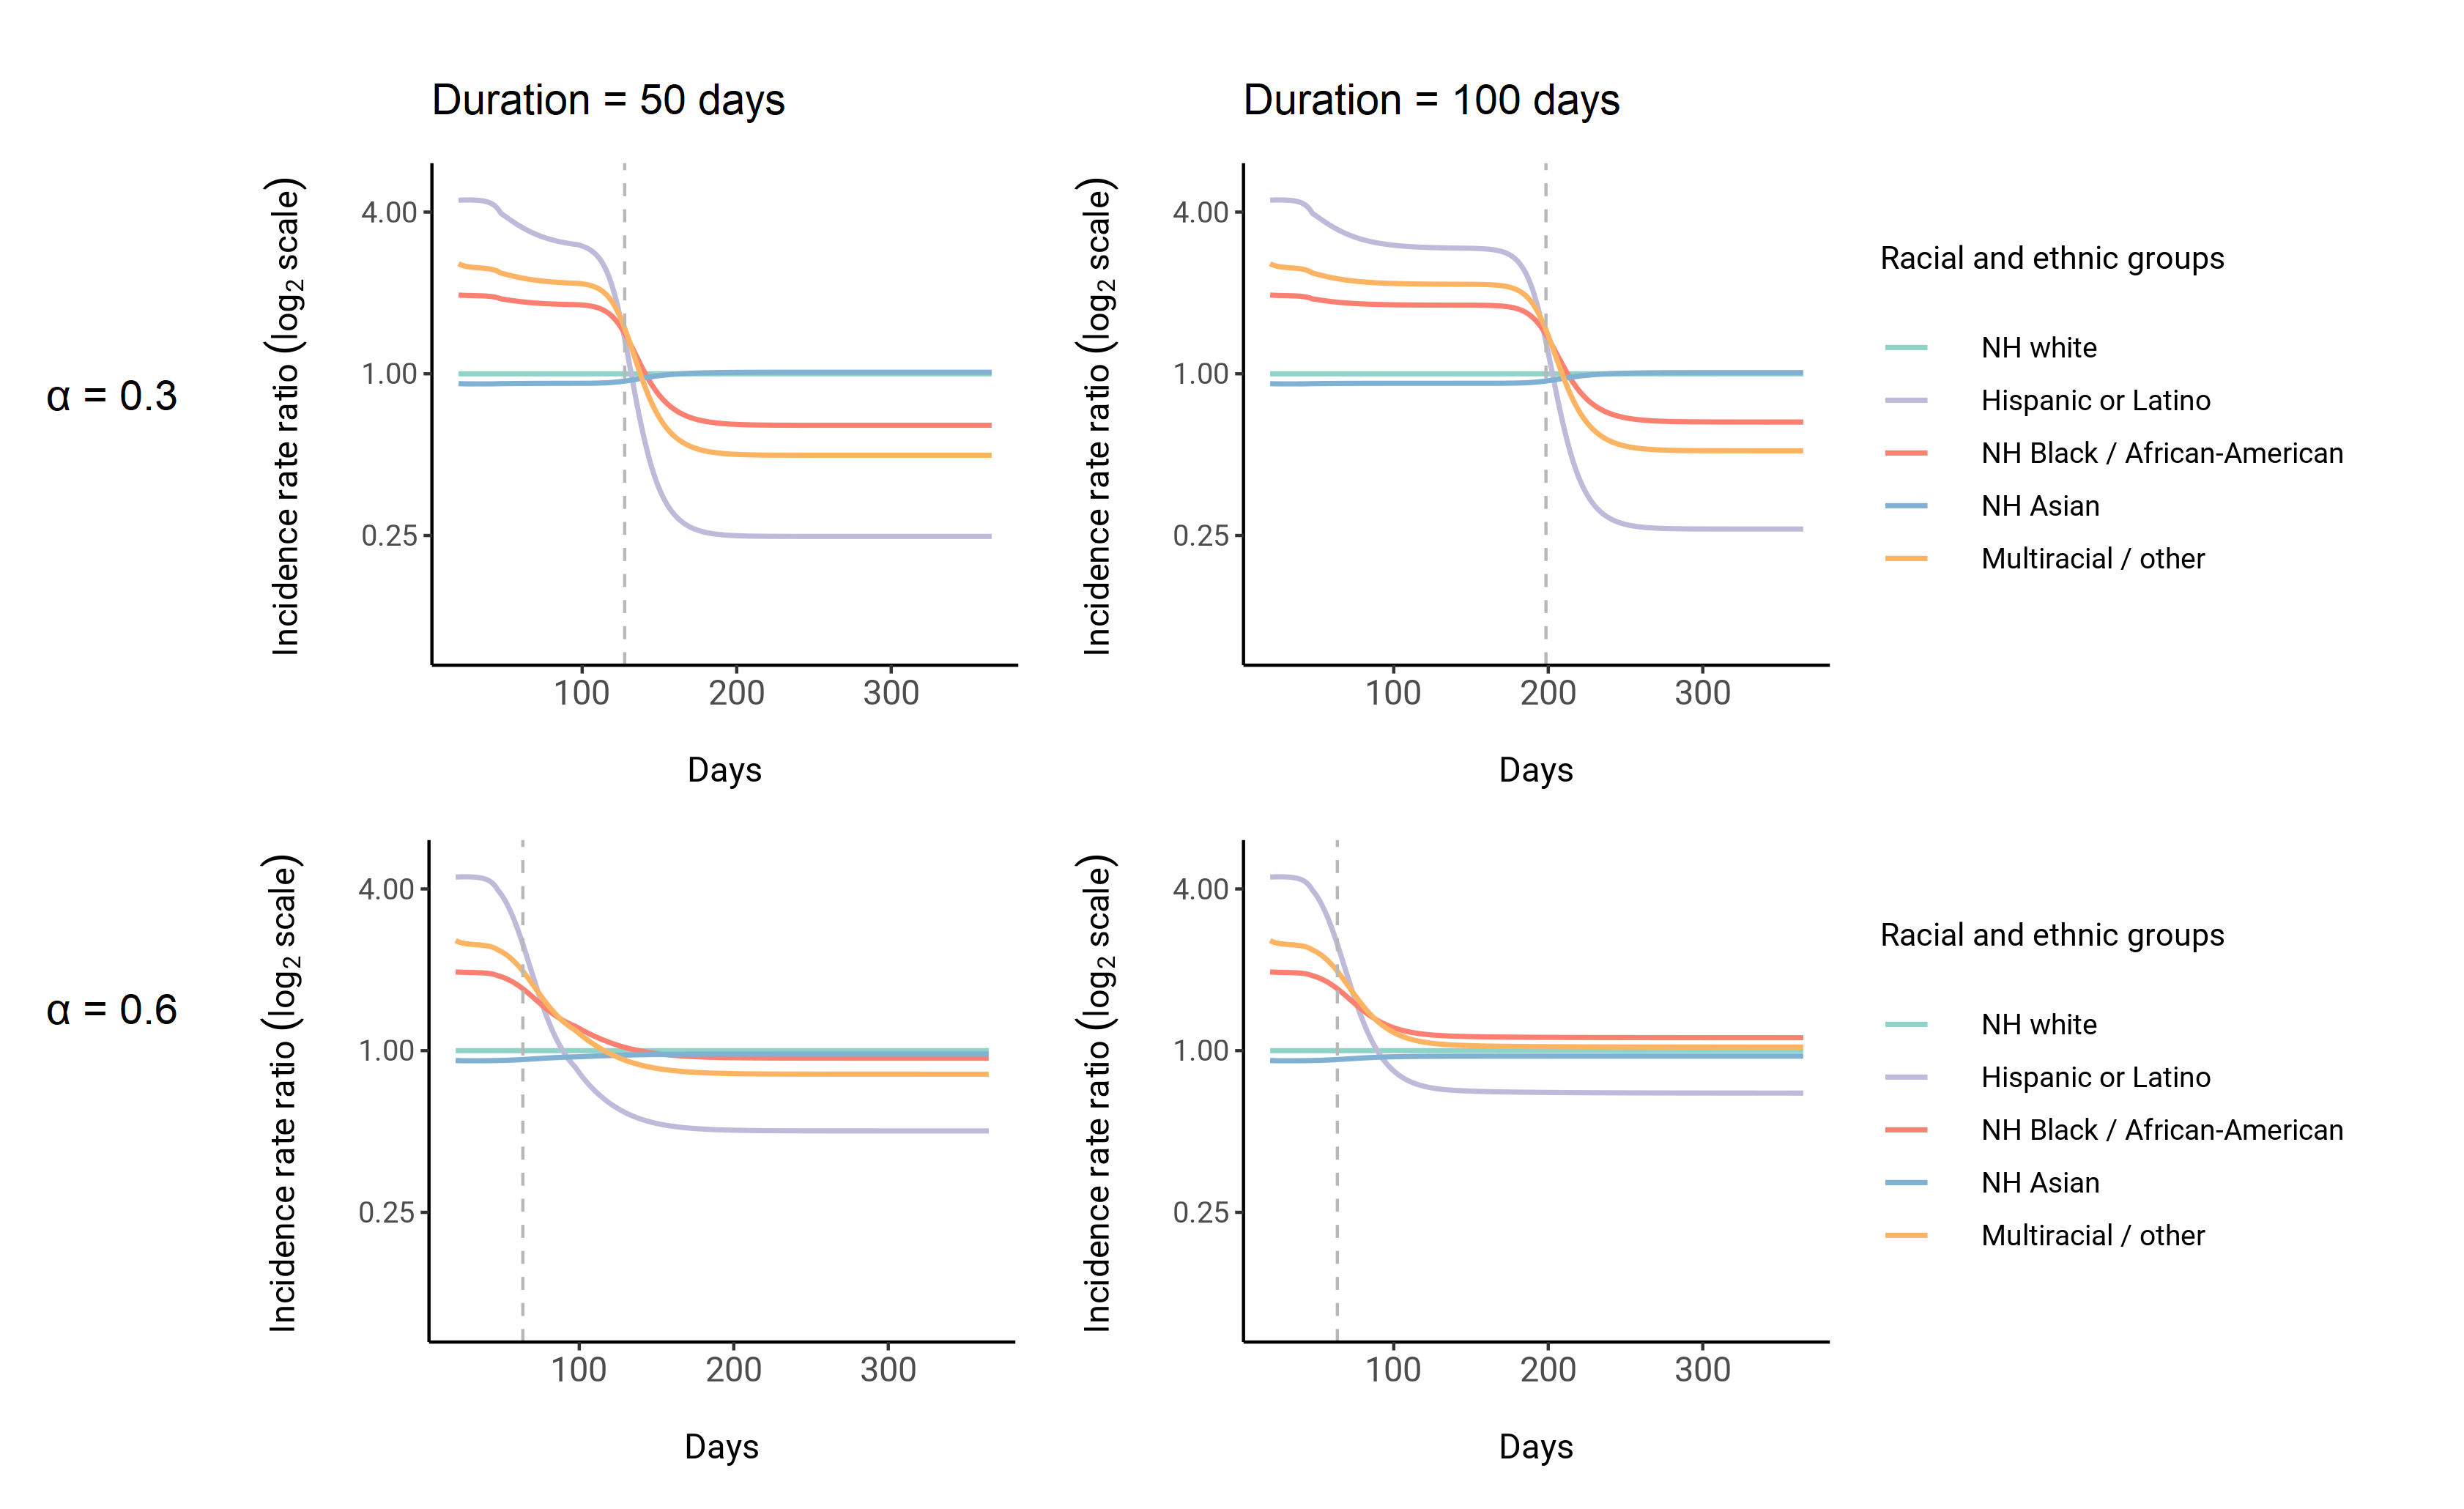

Supplement: supp [file elife-66601-supp-v2.zip › elife_poa_e66601_Figure_3_figure_supplement_3.png]
